# Supplementary material for: Suicidal feelings in the twilight of life: a cross-sectional population-based study of 97-year-olds
Source: PubMed Central journal article supplement — BMJ Open. 2013 Feb 1;3(2):e002260. doi: 10.1136/bmjopen-2012-002260 (PMC3586106; doi:10.1136/bmjopen-2012-002260), 2013-02-01
Supplement: bmjopen-2012-002260.draft_revisions.pdf [file bmjopen-2012-002260.draft_revisions.pdf]

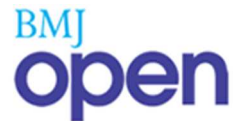

**Suicidal feelings in the twilight of life: A cross-sectional population-based study of 97-year-olds**

|                                 |                                                                                                                                                                                                                                                                                                                                                                                                                                                                                                                                                       |
|---------------------------------|-------------------------------------------------------------------------------------------------------------------------------------------------------------------------------------------------------------------------------------------------------------------------------------------------------------------------------------------------------------------------------------------------------------------------------------------------------------------------------------------------------------------------------------------------------|
| Journal:                        | <i>BMJ Open</i>                                                                                                                                                                                                                                                                                                                                                                                                                                                                                                                                       |
| Manuscript ID:                  | bmjopen-2012-002260                                                                                                                                                                                                                                                                                                                                                                                                                                                                                                                                   |
| Article Type:                   | Research                                                                                                                                                                                                                                                                                                                                                                                                                                                                                                                                              |
| Date Submitted by the Author:   | 24-Oct-2012                                                                                                                                                                                                                                                                                                                                                                                                                                                                                                                                           |
| Complete List of Authors:       | Fässberg, Madeleine; Institute of Neuroscience and Physiology, Department of Psychiatry and Neurochemistry<br>Östling, Svante; Institute of Neuroscience and Physiology, Department of Psychiatry and Neurochemistry<br>Börjesson-Hanson, Anne; Institute of Neuroscience and Physiology, Department of Psychiatry and Neurochemistry<br>Skoog, Ingmar; Institute of Neuroscience and Physiology, Department of Psychiatry and Neurochemistry<br>Waern, Margda; Institute of Neuroscience and Physiology, Department of Psychiatry and Neurochemistry |
| <b>Primary Subject Heading</b>: | Epidemiology                                                                                                                                                                                                                                                                                                                                                                                                                                                                                                                                          |
| Secondary Subject Heading:      | Mental health                                                                                                                                                                                                                                                                                                                                                                                                                                                                                                                                         |
| Keywords:                       | Cross Sectional Study, DEPRESSION, Suicide & self-harm < PSYCHIATRY                                                                                                                                                                                                                                                                                                                                                                                                                                                                                   |
|                                 |                                                                                                                                                                                                                                                                                                                                                                                                                                                                                                                                                       |

SCHOLARONE™  
Manuscripts

Only

1  
2  
3  
4  
5  
6  
7  
8  
9  
10  
11  
12  
13  
14  
15  
16  
17  
18  
19  
20  
21  
22  
23  
24  
25  
26  
27  
28  
29  
30  
31  
32  
33  
34  
35  
36  
37  
38  
39  
40  
41  
42  
43  
44  
45  
46  
47  
48  
49  
50  
51  
52  
53  
54  
55  
56  
57  
58  
59  
60

Suicidal feelings in the twilight of life: A cross-sectional population-based study  
of 97-year-olds

Madeleine Mellqvist Fässberg, M.Sc., Svante Östling, M.D., Ph.D., Anne Börjesson-Hanson,  
M.D., Ph.D., Ingmar Skoog, M.D., Ph.D., Margda Wærn, M.D., Ph.D. Neuropsychiatric  
Epidemiology Unit, Section for Psychiatry and Neurochemistry, Institute of Neuroscience and  
Physiology, Sahlgrenska Academy, University of Gothenburg, Sweden.

Correspondence to: Madeleine Mellqvist Fässberg, Neuropsychiatric Epidemiology Unit,  
Neuropsychiatry SU/Mölndal, Wallinsgatan 6, SE-431 41 Mölndal, Sweden, +46 31 3438642,  
madeleine.mellqvist@neuro.gu.se

Word count: 2858

## Abstract

**Objective** To examine the occurrence of suicidal feelings in extreme old age. Further, to identify factors associated with such feelings.

**Design** Cross-sectional population-based study.

**Setting** Gothenburg, Sweden

**Participants** 269 adults (197 women, 72 men) without dementia born in 1901-1909 who participated in a psychiatric examination.

**Main outcome measures** Death thoughts. Past month suicidal feelings in accordance with the Paykel questions.

**Results** One quarter of the sample (26.7 %) reported that they thought about their own death at least once a month. Thoughts that life was not worth living were acknowledged by 7.9 % of the total sample, death wishes by 10.5 % and thoughts of taking life by 3.8 %. Few had serious thoughts of taking own life (0.8%) and none had attempted suicide. In all, 11.5% acknowledged some level of suicidal feelings. Most (77.4 %) of those who reported such feelings fulfilled criteria for neither major nor minor depression. Neither poor perceived health nor disability (hearing, vision, motor function) were associated with suicidal feelings. Problematic sleep and deficient social contacts were related to suicidal feelings also after adjustment for depression.

**Conclusions** Suicidal feelings may occur outside the context of depression and disability in this age group. Results can inform clinicians who care for persons in extreme late life.

## Article summary

### Article focus

- Death wishes and suicidal ideation are common among older adults and have been shown to be associated with mental and physical illness, functional disability and social factors.
- The situation for persons who reach *extreme* old age is less clear.

### Key messages

- While depression was associated with suicidal feelings, three-quarters of those who had such feelings fulfilled criteria for neither major nor minor depression. Screening programs that aim at the identification and treatment of depression may fail to identify extremely old persons who could benefit from interventions
- The results of this study suggest that attention to pain and sleep issues as well as increased opportunities for social contacts might constitute targets for the reduction of suicidal feelings in very late life.

### Strengths and limitations of the study

- Strengths of this population-based study include the extreme high age of the participants and the fact that also persons living in institutions were included. Diagnostics were based on face-to-face interviews with clinicians trained in the use of a structured instrument for the rating of psychiatric symptoms.
- This is a cross-sectional study and we can therefore not draw conclusions regarding causality. Associations may be bidirectional.
- Although this is largest population-based study performed in extreme old age, some subgroups are small which is reflected by the large confidence intervals.

## Introduction

Later life is a time of many losses for the individual, and this might help to explain the fact that high rates of suicide are observed in older adults.<sup>1</sup> As populations age, clinicians can be expected to more frequently encounter persons with death wishes and thoughts of suicide.

Prevalence rates of suicidal ideation in population-based studies that focus specifically on older age groups range from 2-16%.<sup>2-6</sup> The phenomenon is even more pronounced in the nursing home setting.<sup>7</sup> Risk factors for suicidal ideation and behaviour in later life include mental and physical illness, functional disability and social factors.<sup>8,9</sup> However, surprisingly little is known about these phenomena in *extreme* old age. Persons who reach their upper nineties represent a survival population and findings regarding suicidal feelings in “younger” older samples may prove to be of less relevance here. One might expect that thoughts about death common are common at an age when natural death is imminent. But how common are suicidal feelings in those whose lives span over almost a century? Do such feelings arise in the context of depression and disability, as in younger age groups? How salient are social factors?

The first aim of this study was to estimate the frequency of death thoughts and suicidal feelings in a total population cohort of 97-year-olds without dementia. The second aim was to identify factors associated with suicidal feelings.

## Methods

### *Study participants*

Field Code Changed

Field Code Changed

1  
2  
3  
4  
5  
6  
7 The study is part of the Gothenburg 95+ study which focuses on mental health in very late  
8 life.<sup>10</sup> All 97-year-olds living in Gothenburg, Sweden, born between July 1, 1901, and  
9 December 31, 1909 (N=973, 817 women, 156 men) were invited to participate. Names and  
10 addresses were obtained from the Swedish Population Register. Both persons living at home  
11 and in institutions were included. Forty-eight persons died before they could be contacted,  
12 eight persons were excluded due to insufficient knowledge of the Swedish language, four had  
13 emigrated, and two could not be traced, leaving 911 persons eligible for inclusion (764  
14 women, 147 men). A total of 591 (484 women, 107 men) agreed to participate (or, in cases  
15 with severe cognitive impairment, had proxy consent via next-of-kin). The overall response  
16 rate was 64.9 %. As previously reported,<sup>11</sup> 2-year mortality rates were similar in participants  
17 (52.8 %) and non-participants (50.9 %). Persons who received a research diagnosis of  
18 dementia (n=322, see procedure below) were excluded from the current study, leaving 269  
19 individuals (197 women, 72 men).

### 32 *Procedure*

33  
34  
35 Participants were examined by a psychiatrist/psychiatric nurse/research psychologist during  
36 two home visits. A detailed description of procedures was recently reported.<sup>11</sup> The structured  
37 examination included physical and neuropsychiatric examinations, history of previous and  
38 current disorders, prescription drug use, and assessments of activities of daily living and  
39 social factors. The examinations were conducted between 1998 and 2007. Participants were  
40 asked to identify a close relative who could give collateral information and these were  
41 contacted for a telephone interview.

### 49 *Neuropsychological examination*

50  
51  
52 The neuropsychological examination included the Swedish version of the Mini Mental State  
53 Examination (MMSE),<sup>12</sup> as well as tests of short- and long term memory, abstract thinking,

Field Code Changed

Field Code Changed

Field Code Changed

Field Code Changed

1  
2  
3  
4  
5  
6  
7  
8  
9  
10  
11  
12  
13  
14  
15  
16  
17  
18  
19  
20  
21  
22  
23  
24  
25  
26  
27  
28  
29  
30  
31  
32  
33  
34  
35  
36  
37  
38  
39  
40  
41  
42  
43  
44  
45  
46  
47  
48  
49  
50  
51  
52  
53  
54  
55  
56  
57  
58  
59  
60

aphasia, apraxia, and agnosia. Results from the examination and from the interview with next-of-kin were used to make dementia diagnoses in accordance with DSM III-R.<sup>13</sup> For the purpose of this study, a research diagnosis of dementia was used as an exclusion criterion only.

Field Code Changed

### *Psychiatric examination*

The semi-structured examinations included ratings of psychiatric signs and symptoms during the preceding month in accordance with the Comprehensive Psychopathological Rating Scale (CPRS).<sup>14</sup> Participants were asked how often they thought of their own death (never, occasionally, more frequently than once a month, more frequently than once a week, several times per week, daily). For the purpose of this paper, a person who acknowledged thoughts of own death more often than once a month was considered to have frequent thoughts of death. Thoughts about life-weariness, death wishes and suicide thoughts were rated according to Paykel and colleagues<sup>15</sup> using the following questions: (1) Have you ever felt that life was not worth living? (2) Have you ever wished you were dead-for instance, that you could go to sleep and not wake up? (3) Have you ever thought of taking your life, even if you would not really do it? (4) Have you ever reached the point where you seriously considered taking your life, or perhaps made plans how you would go about doing it? (5) Have you ever attempted to take your life? The most recent time any of these thoughts had occurred was noted. In this study, reports of suicidal feelings during the past month were used, in order to coincide with measures used for psychiatric symptoms and signs. A person who responded “yes” to any of the five Paykel questions was considered to have suicidal feelings.

Field Code Changed

Field Code Changed

### *Sleep*

Participants were asked if they were satisfied with their sleep (no/yes). A person who scored  $\geq 4$  on the CPRS *Reduced sleep* item was considered to have reduced sleep. Correspondingly,

1  
2  
3  
4  
5  
6  
7 a score  $\geq 4$  on the *increased sleep* item was used to define *Increased sleep*. Participants were  
8 asked if they had *difficulties initiating sleep* which was defined as  $> \frac{1}{2}$  hour latency, and if  
9 they experienced problems with *Early morning awakening*. An estimation of total hours of  
10 sleep per 24-hour period was made based on responses concerning times of sleep initiation  
11 and awakening for both night time sleep and naps.  
12  
13  
14

### 15 16 17 *Health*

18  
19 Questions regarding sudden onset of focal symptoms or acute aphasia, symptom duration and  
20 admission to hospital due to Stroke/TIA were asked both during the self-report examination  
21 and close-informant interview. The Swedish Hospital Discharge register also provided  
22 diagnoses of stroke and TIA. Only cases with evidence of focal symptoms (i.e. paresis or  
23 aphasia) as documented by any of the above sources were considered to have stroke/TIA.<sup>11</sup>  
24  
25  
26  
27

Field Code Changed

28  
29 Hearing and vision were assessed through observation during the initial home visit. *Hearing*  
30 *impairment* was defined as deafness or a hearing defect which disturbed conversation during  
31 the interview despite hearing aid use. *Vision impairment* was defined as blindness or a defect  
32 which made some of the examination tasks impossible to perform despite own glasses or use  
33 of magnifying glass.  
34  
35  
36  
37  
38

39  
40 The CPRS item “aches and pains” was used to identify participants who experienced aches  
41 and pains during the past month. For the purpose of this study, those who scored  $\geq 4$ , *Having*  
42 *long-standing and disturbing aches or pains, need for pain relief, or intensive disabling pains*  
43 were considered to have aches and pains.  
44  
45  
46  
47

48  
49 For participants born in 1905-1909 (n=166), a question was added *How do you perceive your*  
50 *current health?* Responses were dichotomised as follows: good (fairly good/good/very good)  
51 and poor (fairly poor/poor/very poor).  
52  
53  
54  
55



### Motor functions

Six different motor functions (dressing, eating, physical activity, spontaneous activity, personal hygiene, and control of bladder and bowel) were examined in accordance with the Gottfries-Bråne-Steen scale (GBS).<sup>16</sup> This instrument has shown high reliability and validity.<sup>17</sup> Each item is rated from 0 (normal function) to 6 (maximal disturbance), yielding a maximum score of 36.

### Demographics and Social factors

Demographic variables were categorized as follows: education beyond mandatory ( $\geq 6$  years) (no/yes), death of a parent before age 16 (no/yes), always been single (no/yes), current partner (no/yes), widow/widower (no/yes), children (no/yes), death among children and/or grandchildren (no/yes), living in an institution (no/yes). Participants were also asked if they considered themselves to be religious (no/yes), and if they attended services/followed services by radio or TV (no/yes).

Detailed data on social factors were available for the subgroup born 1905-1909 (n=166). All items were dichotomized as follows: Do you have a confidant (no/yes), do you have more than one confidant (no/yes), too little time spent with children (no/yes), too little time spent with grandchildren (no/yes), too little time spent with friends and acquaintances (no/yes), too little time spent with neighbours (no/yes), less time spent with friends and family than before retirement (no/yes), and perceived loneliness (no/yes).<sup>18</sup>

### Diagnostics

Psychiatric diagnoses were made in accordance with the Diagnostic and Statistical Manual of Mental Disorders, Third Edition, Revised (DSM-III-R),<sup>19</sup> as described previously.<sup>13</sup> Minor depression was diagnosed in accordance with DSM-IV research criteria.<sup>20</sup> Due to lack of

Field Code Changed

1  
2  
3  
4  
5  
6  
7 information, we disregarded the six month duration criteria of psychotic symptoms for  
8 diagnosis of schizophrenia. We used a hierarchical diagnostic scheme.<sup>10</sup> Depression (major  
9 depression, minor depression) or GAD was not diagnosed if a psychotic disorder was present.  
10  
11 GAD was not diagnosed if major depression was present. Diagnostic entities were merged for  
12  
13 analyses regarding psychiatric illnesses. Schizophrenia and schizophreniform disorders were  
14  
15 treated as one entity, *psychotic disorder*. This disorder also included Delusional disorder and  
16  
17 Psychotic disorder not otherwise specified (NOS). Major and minor depression were merged  
18  
19 into *any depression*. Anxiety disorder included Generalized Anxiety Disorder (GAD) and  
20  
21 phobic disorder (agoraphobia/social phobia/simple phobia).  
22  
23  
24  
25

### 26 *Statistical Analysis*

27  
28 The t-test was used to test differences in means.  $\chi^2$  and Fisher's exact test were employed to  
29  
30 analyze differences in proportions. Due to the relatively small number of participants in some  
31  
32 subgroups, exact logistic regression was used to analyze associations of interest. All  
33  
34 independent variables that showed significant associations with suicidal feelings in the  
35  
36 bivariate exact logistic regression analyses were analyzed in separate multivariate exact  
37  
38 logistic regression models, adjusting for sex and any depression. Three-year mortality was  
39  
40 calculated from date of examination, utilizing dates of death obtained from the Swedish  
41  
42 Population Register. Statistical analyses were performed with IBM SPSS Statistics, version  
43  
44 20 for Windows and SAS 9.2. Results were considered significant when  $p < 0.05$ .  
45  
46  
47  
48

## 49 **Results**

50  
51 Demographic and diagnostic characteristics of the study sample are shown in Table 1. The  
52  
53 proportion reporting thoughts about own death more than once a month was 26.7 %. One out  
54  
55

Field Code Changed

of ten participants reported that they had experienced some level of suicidal feelings during the last month, and this was more common in women (Table 2). No sex difference could be shown regarding one month frequencies of thoughts that life was not worth living, but death wishes were more often endorsed by women. Thoughts of taking one's own life were reported by 3.8 %. Serious consideration of taking life was rare (0.8 %). None of the participants had attempted suicide during the past month.

Table 1. Demographic and diagnostic characteristics in a population sample of 97-year-olds without dementia (n=269).

|                                 | n       | %    |
|---------------------------------|---------|------|
| <b>Demographics</b>             |         |      |
| Female                          | 197/269 | 73.2 |
| Education beyond mandatory      | 109/189 | 57.6 |
| Living in an institution        | 77/266  | 28.9 |
| <b>Partner status (current)</b> |         |      |
| Partner                         | 10/266  | 3.8  |
| Divorced                        | 12/266  | 4.5  |
| Widowed                         | 208/266 | 78.2 |
| Always single                   | 36/266  | 13.5 |
| <b>Psychiatric disorders</b>    |         |      |
| Any depression                  | 22/269  | 8.2  |
| Major depression                | 8/269   | 3.0  |
| Minor depression                | 14/269  | 5.2  |
| Anxiety disorder                | 16/269  | 5.9  |
| Generalized anxiety disorder    | 8/269   | 3.0  |
| Phobic disorder                 | 9/269   | 3.3  |
| Psychotic disorder              | 12/269  | 4.5  |
| Schizophrenia                   | 6/269   | 2.2  |

|                        |       |     |
|------------------------|-------|-----|
| Psychotic disorder NOS | 6/269 | 2.2 |
|------------------------|-------|-----|

Table 2. One-month frequency of suicidal feelings<sup>a</sup> in a population sample of 97-year-olds without dementia, by sex (n=269).

|                                       | Women  |      | Men  |     | Total  |      | P <sup>b</sup> |
|---------------------------------------|--------|------|------|-----|--------|------|----------------|
|                                       | n=197  | %    | n=72 | %   | n=269  | %    |                |
| Any suicidal feelings                 | 27/197 | 13.7 | 4/72 | 5.6 | 31/269 | 11.5 | <b>0.045</b>   |
| Thought that life is not worth living | 17/196 | 8.7  | 4/70 | 5.7 | 21/266 | 7.9  | 0.308          |
| Death wishes                          | 25/196 | 12.8 | 3/70 | 4.3 | 28/266 | 10.5 | <b>0.033</b>   |
| Thought of taking own life            | 9/194  | 4.6  | 1/70 | 1.4 | 10/264 | 3.8  | 0.206          |
| Seriously considered taking own life  | 1/194  | 0.5  | 1/70 | 1.4 | 2/264  | 0.8  | 0.461          |
| Attempted suicide                     | 0/194  | (-)  | 0/70 | (-) | 0/264  | (-)  |                |

Note: <sup>a</sup> According to Paykel, <sup>b</sup> sex differences, in accordance with Fisher's exact test.

Field Code Changed

### *Associations with suicidal feelings*

Frequent thoughts of death were more common among individuals reporting suicidal feelings than those without such feelings (70.0 % vs. 21.2 %, p=0.000). Over a quarter of those who never had a spouse/partner reported suicidal feelings, and there was a significant association with suicidal feelings (Table 3). Individuals reporting suicidal feelings were less likely to have children than those without such feelings. Living in an institution was not associated with suicidal feelings.

Table 3 shows further that while depression was more than three times more common among participants with suicidal feelings than in those without, most of those who reported suicidal feelings fulfilled criteria for neither major nor minor depression. No association could be

1  
2  
3  
4  
5  
6  
7 found with anxiety disorder or psychotic disorder. Few had a history of psychiatric inpatient  
8 or outpatient care and proportions were similar in those with and without suicidal feelings (3.2  
9 % vs. 3.8 %  $p=0.677$ ). Mean MMSE scores were almost identical in participants with and  
10 without suicidal feelings (25.23 vs.25.72, 95 % CI -0.99-1.96,  $p=0.519$ ).  
11  
12

13  
14 Table 3 shows further that nearly 90 % of those reporting suicidal feelings were dissatisfied  
15 with sleep, compared to two-thirds of those without such feelings. Problematic sleep initiation  
16 was more common among those with suicidal feelings. However, the mean number of hours  
17 of sleep reported per day was similar among participants with and without suicidal feelings  
18 (7.7 vs. 7.8 (95 % CI -0.71-0.87,  $p=0.836$ )). Nearly 23 % of those with suicidal feelings had a  
19 history of stroke/TIA, and the proportion was similar in those who did not report such  
20 feelings. Forty per cent of those with suicidal feelings reported aches and pains, a proportion  
21 significantly greater than that in the group without suicidal feelings. None of the participants  
22 in the total group rated their health as very poor and only 13 % perceived their current health  
23 as rather poor/poor. No difference could be found between those with and without suicidal  
24 feelings.  
25  
26

27  
28 Over one third of the sample had a hearing impairment and more than one quarter had vision  
29 impairment. However, no difference could be found between those with and without suicidal  
30 feelings in regards to these impairments. No difference in mean motor GBS-score could be  
31 shown between those with and without suicidal feelings (5.0 vs. 3.8, 95 % CI -3.23-0.80,  
32  $p=0.236$ ). Over half of the participants died within three years; there was no significant  
33 difference in proportions between those with and without suicidal feelings (64.5 % vs. 50.8  
34 %,  $p=0.106$ ).  
35  
36

37  
38  
39  
40  
41  
42  
43  
44  
45  
46  
47  
48  
49  
50  
51  
52  
53 Table 3. Associations with past month suicidal feelings<sup>a</sup> (n=269).  
54

|                                    | Suicidal feelings |      | No suicidal feelings |      | p <sup>b</sup> |
|------------------------------------|-------------------|------|----------------------|------|----------------|
|                                    | n=31              | %    | n=238                | %    |                |
| <b>Demographics</b>                |                   |      |                      |      |                |
| Education beyond mandatory         | 9/20              | 45.0 | 100/169              | 59.2 | 0.447          |
| Living in an institution           | 11/30             | 36.7 | 66/236               | 28.0 | 0.216          |
| <b>Partner status (current)</b>    |                   |      |                      |      |                |
| Partner                            | 0/31              | (-)  | 10/235               | 4.3  |                |
| Divorced                           | 2/31              | 6.5  | 10/235               | 4.5  | 0.418          |
| Widow/widower                      | 21/29             | 67.7 | 187/235              | 79.6 | 0.105          |
| Always been single                 | 8/31              | 25.8 | 28/235               | 11.9 | <b>0.039</b>   |
| Children                           | 10/31             | 32.3 | 126/234              | 53.8 | <b>0.019</b>   |
| <b>Life events</b>                 |                   |      |                      |      |                |
| Death of a parent before age 16    | 5/22              | 22.7 | 26/167               | 15.6 | 0.280          |
| Death among children/grandchildren | 8/18              | 44.4 | 40/166               | 24.1 | 0.061          |
| <b>Religion</b>                    |                   |      |                      |      |                |
| Religious                          | 18/30             | 60.0 | 133/236              | 56.4 | 0.430          |
| Active religiously                 | 12/30             | 40.0 | 91/236               | 38.6 | 0.514          |
| <b>Psychiatric disorders</b>       |                   |      |                      |      |                |
| Any depression                     | 7/31              | 22.6 | 15/238               | 6.3  | <b>0.007</b>   |
| Anxiety disorder                   | 4/31              | 12.9 | 12/238               | 5.0  | 0.097          |
| Psychotic disorder                 | 1/31              | 3.2  | 11/238               | 4.6  | 0.587          |
| <b>Sleep</b>                       |                   |      |                      |      |                |
| Dissatisfied with sleep            | 26/30             | 86.7 | 153/233              | 65.7 | <b>0.013</b>   |
| Reduced sleep                      | 6/28              | 21.4 | 34/233               | 14.6 | 0.242          |
| Difficulties initiating sleep      | 22/30             | 73.3 | 103/235              | 43.8 | <b>0.002</b>   |
| Early morning awakening            | 5/30              | 16.7 | 22/235               | 9.4  | 0.174          |
| Increased sleep                    | 1/28              | 3.6  | 3/233                | 1.3  | 0.367          |
| <b>Health</b>                      |                   |      |                      |      |                |
| Stroke/TIA                         | 7/31              | 22.6 | 37/238               | 15.5 | 0.224          |
| Aches and pains                    | 12/29             | 41.4 | 58/237               | 24.5 | <b>0.046</b>   |
| Poor perceived health              | 3/13              | 23.1 | 12/93                | 12.9 | 0.270          |
| <b>Impairments</b>                 |                   |      |                      |      |                |
| Hearing impairment                 | 10/30             | 33.3 | 88/238               | 37.0 | 0.431          |
| Vision impairment                  | 8/31              | 25.8 | 69/238               | 29.0 | 0.447          |

Note: <sup>a</sup> According to Paykel,<sup>15</sup> <sup>b</sup> in accordance with Fisher's exact test.

Field Code Changed

### Results of regression analyses

Table 4 shows results of regression analyses. Never having children was associated with suicidal feelings. However, this association did not remain in the adjusted analysis.

Depression was associated with a four-fold increase in odds of having suicidal feelings, and the association remained after adjusting for sex. As suicidal ideation is a symptom of depression, we reanalysed data after removing this symptom from the diagnostic algorithm.

This did not affect our results. Both dissatisfaction with sleep and difficulties initiating sleep were associated with a more than three-fold increase in odds of having suicidal feelings.

However, after adjusting for sex and depression, only difficulties initiating sleep remained an independent determinant.

Table 4. Results of separate exact logistic regression models showing odds of having past month suicidal feelings<sup>a</sup> (n=269).

|                                            | Crude           |           |              | Adjusted          |           |              |
|--------------------------------------------|-----------------|-----------|--------------|-------------------|-----------|--------------|
|                                            | OR <sup>b</sup> | 95 % CI   | p            | OR <sup>c</sup>   | 95 % CI   | p            |
| Sex                                        | 2.69            | 0.89-11.0 | 0.089        |                   |           |              |
| Always been single <sup>d</sup>            | 2.56            | 0.90-6.67 | 0.078        |                   |           |              |
| Children <sup>e</sup>                      | 0.41            | 0.16-0.96 | <b>0.037</b> | 0.47              | 0.18-1.11 | 0.091        |
| Any depression                             | 4.30            | 1.35-12.6 | <b>0.013</b> | 3.79 <sup>f</sup> | 1.18-11.2 | <b>0.025</b> |
| Dissatisfied with sleep <sup>g</sup>       | 3.39            | 1.12-13.8 | <b>0.026</b> | 3.02              | 0.99-12.4 | 0.053        |
| Difficulties initiating sleep <sup>h</sup> | 3.51            | 1.43-9.50 | <b>0.004</b> | 3.52              | 1.41-9.73 | <b>0.004</b> |
| Aches and pains <sup>i</sup>               | 2.17            | 0.89-5.16 | 0.091        |                   |           |              |

Note: <sup>a</sup> According to Paykel.<sup>15</sup> <sup>b</sup> Bivariate exact logistic regression. <sup>c</sup> Separate exact logistic regression, adjusted for sex and any depression. <sup>d</sup> Missing value for 3 subjects. <sup>e</sup> Missing value for 4 subjects. <sup>f</sup> Adjusted for sex. <sup>g</sup> Missing value for 6 subjects. <sup>h</sup> Missing value for 4 subjects. <sup>i</sup> Missing value for 3 subjects.

Field Code Changed

### *Suicidal feelings and social factors*

Detailed data regarding social interactions were available for participants born in 1905-1909 (Table 5). Reports of too little time spent with friends and acquaintances and too little time spent with neighbours were associated with suicidal feelings (Table 6). The same was the case for reports of perceived loneliness. Too little time spent with friends and acquaintances and too little time spent with neighbours remained significant in separate regression models adjusted for sex and depression. The strongest association was found between spending too little time with friends and acquaintances, which yielded a more than six-fold increase in odds in the adjusted model.

Table 5. Social characteristics in participants with and without past month suicidal feelings<sup>a</sup> (n=166<sup>b</sup>).

|                                                                | Suicidal Feelings |      | No Suicidal Feelings |      | p            |
|----------------------------------------------------------------|-------------------|------|----------------------|------|--------------|
|                                                                | n=19              | %    | n=147                | %    |              |
| Has a confidant                                                | 13/18             | 72.2 | 105/141              | 74.5 | 0.517        |
| More than one confidant                                        | 6/17              | 35.3 | 59/135               | 43.7 | 0.348        |
| Too little time spent with children                            | 5/10              | 50.0 | 18/104               | 17.3 | <b>0.027</b> |
| Too little time spent with grandchildren                       | 2/9               | 22.2 | 21/101               | 20.8 | 0.600        |
| Too little time spent with friends and acquaintances           | 8/16              | 50.0 | 18/127               | 14.2 | <b>0.002</b> |
| Too little time spent with neighbours                          | 6/18              | 33.3 | 11/138               | 8.0  | <b>0.006</b> |
| Less time spent with friends and family than before retirement | 8/16              | 50.0 | 72/167               | 25.2 | <b>0.041</b> |
| Perceived loneliness                                           | 12/18             | 66.7 | 45/139               | 32.4 | <b>0.006</b> |

Note: <sup>a</sup> According to Paykel.<sup>15</sup> <sup>b</sup> Data available for participants born 1905-1909 only.

Field Code Changed



Table 6. Results of separate exact logistic regression models showing the association between social characteristics and past month suicidal feelings<sup>a</sup> (n=166<sup>b</sup>).

|                                                                             | Crude           |           |              | Adjusted        |           |              |
|-----------------------------------------------------------------------------|-----------------|-----------|--------------|-----------------|-----------|--------------|
|                                                                             | OR <sup>c</sup> | 95 % CI   | p            | OR <sup>d</sup> | 95 % CI   | p            |
| Too little time spent with children <sup>e</sup>                            | 4.69            | 0.97-22.8 | 0.054        |                 |           |              |
| Too little time spent with neighbours <sup>f</sup>                          | 5.67            | 1.46-20.7 | <b>0.011</b> | 5.00            | 1.10-20.9 | <b>0.036</b> |
| Too little time spent with friends and acquaintances <sup>g</sup>           | 5.94            | 1.71-20.9 | <b>0.004</b> | 6.61            | 1.59-29.9 | <b>0.007</b> |
| Less time spent with friends and family than before retirement <sup>h</sup> | 2.94            | 0.88-9.83 | 0.082        |                 |           |              |
| Perceived loneliness <sup>i</sup>                                           | 4.14            | 1.33-14.3 | <b>0.011</b> | 3.33            | 0.98-12.3 | 0.053        |

Note: <sup>a</sup> According to Paykel.<sup>15</sup> <sup>b</sup> Data available for participants born 1905-1909 only. <sup>c</sup> Bivariate exact logistic regression.

<sup>d</sup> Separate exact multivariate logistic regression, adjusted for sex and any depression. <sup>e</sup> Missing value for 52 subjects.

<sup>f</sup> Missing value for 10 subjects. <sup>g</sup> Missing value for 23 subjects. <sup>h</sup> Missing value for 23 subjects. <sup>i</sup> Missing value for 9 subjects.

Field Code Changed

## Discussion

To our knowledge, this is the first population-based study to examine thoughts of death and suicidal feelings in extreme old age. While depression was associated with suicidal feelings, three-quarters of those who had such feelings fulfilled criteria for neither major nor minor depression. Social factors were strong determinants of suicidal feelings.

Difficulties initiating sleep was associated with suicidal feelings even after depression was taken into consideration, which parallels findings from a population study that included “younger” older persons.<sup>21</sup> However, it is important to stress that conclusions regarding causality cannot be drawn from cross-sectional studies. The association may be bidirectional. The wish to die may keep the individual awake, and problematic sleep may lead to a wish to die.

Field Code Changed

1  
2  
3  
4  
5  
6  
7 Somewhat unexpectedly, we could not show relationships with several health-related factors.

8 Physical disability has been shown to associate with both suicidal feelings<sup>21</sup> and death by  
9 suicide<sup>22</sup> in younger populations. Most participants in the current study reported good to very  
10 good health. This is a unique population sample consisting of cognitively relatively intact  
11 good health. This is a unique population sample consisting of cognitively relatively intact  
12 persons who have reached extreme high age. One might argue that results might be inflated  
13 by a tendency for persons in poor health to refuse participation to a greater extent than those  
14 in better health. However, our attrition analysis regarding mortality suggests that this is not  
15 the case. Another possibility is that individual perceptions of health and quality of life shift in  
16 the “oldest old”<sup>23</sup> which could render health factors of less importance in explaining suicidal  
17 feelings in extreme high age.  
18  
19  
20  
21  
22  
23  
24

25  
26 A more than six-fold increase in odds of suicidal feelings was observed in the context of  
27 unsatisfactory frequency of social contacts. The literature on social factors and suicidal  
28 behaviour in older people is extremely limited.<sup>24</sup> Number and frequency of contacts have been  
29 reported in only a couple of studies.<sup>25 26</sup> The approach used in the current study allowed  
30 participants to give a subjective view of their social relations. This is important as also  
31 persons who are not socially isolated may feel detached from the community.<sup>27</sup>  
32  
33  
34  
35  
36  
37  
38  
39  
40

#### 41 *Methodological considerations*

42  
43  
44 Strengths of the study include the extreme high age of the participants and the fact that also  
45 persons living in institutions were included in this population-based study. Diagnostics were  
46 based on face-to-face interviews with clinicians trained in the use of a structured instrument  
47 for the rating of psychiatric symptoms. The CPRS has been shown to have good reliability  
48 and validity in elderly clinical samples.<sup>28</sup> Questions regarding death wishes and suicidal  
49 thoughts might be perceived as sensitive by some participants. Reporting suicidal feelings to  
50  
51  
52  
53  
54  
55

Field Code Changed

1  
2  
3  
4  
5  
6  
7 an experienced psychiatrist, psychiatric nurse, or psychologist might be easier than to a lay  
8 interviewer. The response rate in this study was 65 %, which may be considered a fairly good  
9 response rate considering the age group. Although this is largest population-based study  
10 performed in extreme old age, some subgroups are small which is reflected by the large  
11 confidence intervals. Failure to show significance, for example regarding the regression  
12 model involving aches and pains, may be due to lack of power.  
13  
14  
15  
16  
17  
18  
19

### 20 21 *Implications*

22  
23  
24 Screening programs that aim at the identification and treatment of depression may fail to  
25 identify extremely old persons who could benefit from interventions. The results of this study  
26 suggest that attention to pain and sleep issues as well as increased opportunities for social  
27 contacts might constitute targets for the reduction of suicidal feelings in very late life.  
28  
29  
30  
31  
32  
33  
34

### 35 **Acknowledgements**

36  
37  
38 The authors thank all study participants and co-workers at the Neuropsychiatric Epidemiology  
39 Unit. A special thank you to Thomas Marlow and Erik Joas for consultation regarding  
40 statistics.  
41  
42  
43  
44

45  
46 **Contributors** MMF analyzed and interpreted the data and drafted the manuscript. SÖ, ABH  
47 and IS interpreted the data and critically revised the manuscript. IS was responsible for  
48 planning the study and data collection. MW was responsible for supervision, drafted and  
49 critically revised the manuscript and interpreted the data. She is the guarantor of the study.  
50  
51  
52  
53  
54

1  
2  
3  
4  
5  
6  
7 **Funding** The study was made possible by grants from The Swedish Research Council 11267,  
8 2005-8460, 825-2007-7462, 2008-7245-5895-70, 2009-62X-21079-01-3, The Swedish  
9 Council for Working Life and Social Research (no 2001-2835, no 2001-2849, 2005-0762,  
10 2008-1210, Epilife 2006-1506), Stiftelsen Söderström-Königska Sjukhemmet, Stiftelsen  
11 Gamla Tjänarinnor, Bror Gadelius Foundation, Hjalmar Svenssons Foundation, Swedish  
12 Brain Power, The Alzheimer's Association (IIRG-03-6168, ZEN-01-3151) and the Bank of  
13 Sweden Tercentenary Foundation.  
14  
15

16 **Competing interests** None declared.  
17

18 **Ethical approval** The Ethics Review Board at the University of Gothenburg approved the  
19 study. All participants were informed of their right to withdraw from the study at any time.  
20  
21 Written consent was obtained. Among participants with clinical dementia, informed consent  
22 was also obtained from a next of kin.  
23  
24

25 **Data sharing statement** There are no additional data available.  
26  
27  
28  
29

## 30 31 32 33 34 35 **References**

- 36 1. World Health Organization. Public Health Action for the Prevention of Suicide, 2012.
- 37 2. Jorm A, Henderson A, Scott R, Korten A, Christensen H, Mackinnon A. Factors associated  
38 with the wish to die in elderly people. *Age Ageing* 1995;24(5):389-92.
- 39 3. Skoog I, Aevansson O, Beskow J, Larsson L, Palsson S, Waern M, et al. Suicidal feelings  
40 in a population sample of nondemented 85-year-olds. *Am J Psychiatry*  
41 1996;153(8):1015-20.
- 42 4. Rao R, Dening T, Brayne C, Huppert F. Suicidal thinking in community residents over  
43 eighty. *Int J Geriatr Psychiatry* 1997;12(3):337-43.
- 44 5. Barnow S, Linden M, Freyberger H. The relation between suicidal feelings and mental  
45 disorders in the elderly: results from the Berlin Aging Study (BASE). *Psychol Med*  
46 2004;34(4):741-46.
- 47 6. Scocco P, Meneghel G, Caon F, Dello Buono M, De Leo D. Death ideation and its  
48 correlates: survey of an over-65-year-old population. *J Nerv Ment Dis*  
49 2001;189(4):210-8.
- 50 7. Scocco P, Fantoni G, Rapattoni M, de Girolamo G, Pavan L. Death ideas, suicidal thoughts,  
51 and plans among nursing home residents *J Geriatr Psychiatry Neurol* 2009;22(2):141-  
52 48.  
53  
54  
55

- 1
- 2
- 3
- 4
- 5
- 6
- 7 8. O'Connell H, Chin A, Cunningham C, Lawlor B. Recent developments: suicide in older  
8 people. *BMJ* 2004;329(7471):895-9.
- 9 9. van Orden K, Conwell Y. Suicides in late life. *Curr Psychiatry Rep* 2011;13(3):234-41.
- 10 10. Borjesson-Hanson A, Waern M, Ostling S, Gustafson D, Skoog I. One-month prevalence  
11 of mental disorders in a population sample of 95-year olds. *Am J of Geriatr Psychiatry*  
12 2011;19(3):284-91.
- 13 11. Andersson M, Guo X, Borjesson-Hanson A, Liebetrau M, Ostling S, Skoog I. A  
14 population-based study on dementia and stroke in 97 year olds. *Age Ageing*  
15 2012;41(4):529-33.
- 16 12. Folstein M, Robins L, Helzer J. The Mini-Mental State Examination. *Arch Gen Psychiatry*  
17 1983;40(7):812.
- 18 13. Skoog I, Nilsson L, Landahl S, Steen B. Mental disorders and the use of psychotropic  
19 drugs in an 85-year-old urban population. *Int Psychogeriatr* 1993;5:33-48.
- 20 14. Asberg M, Montgomery S, Perris C, Schalling D, Sedvall G. A comprehensive  
21 psychopathological rating scale. *Acta Psychiatr Scand Suppl* 1978(271):5-27.
- 22 15. Paykel E, Myers J, Lindenthal J, Tanner J. Suicidal feelings in the general population: a  
23 prevalence study. *Br J of Psychiatry* 1974;124(0):460-9.
- 24 16. Gottfries C, Brane G, Gullberg B, Steen G. A new rating scale for dementia syndromes.  
25 *Arch Gerontol Geriatr* 1982;1(4):311-30.
- 26 17. Brane G, Gottfries C, Winblad B. The Gottfries-Brane-Steen scale: validity, reliability and  
27 application in anti-dementia drug trials. *Dement Geriatr Cogn Disord* 2001;12(1):1-  
28 14.
- 29 18. Mellqvist M, Wiktorsson S, Joas E, Ostling S, Skoog I, Waern M. Sense of coherence in  
30 elderly suicide attempters: the impact of social and health-related factors. *Int*  
31 *Psychogeriatr* 2011:1-8.
- 32 19. American Psychiatric Association. *Diagnostic and Statistical Manual of Mental Disorders*  
33 *3rd ed, revised*, 1987.
- 34 20. American Psychiatric Association. *Diagnostic and Statistical Manual of Mental Disorders*  
35 *4th ed.*, 1994.
- 36 21. Lapiere S, Boyer R, Desjardins S, Dube M, Lorrain D, Preville M, et al. Daily hassles,  
37 physical illness, and sleep problems in older adults with wishes to die. *Int*  
38 *Psychogeriatr* 2012;24(2):243-52.
- 39 22. Kaplan M, McFarland B, Huguot N, Newsom J. Physical illness, functional limitations,  
40 and suicide risk: a population-based study. *Am J Orthopsychiatry* 2007;77(1):56-60.
- 41 23. Wilhelmson K, Andersson, C., Waern, M., Allebeck, P Elderly people's perspectives on  
42 quality of life. *Ageing Soc* 2005;25:585-600.
- 43 24. Fassberg M, van Orden K, Duberstein P, Erlangsen A, Lapiere S, Bodner E, et al. A  
44 systematic review of social factors and suicidal behavior in older adulthood. *Int J*  
45 *Environ Res Public Health* 2012;9(3):722-45.
- 46 25. Bartels S, Coakley E, Oxman T, Constantino G, Oslin D, Chen H, et al. Suicidal and death  
47 ideation in older primary care patients with depression, anxiety, and at-risk alcohol  
48 use. *Am J Geriatr Psychiatry* 2002;10(4):417-27.
- 49 26. Turvey C, Conwell Y, Jones M, Phillips C, Simonsick E, Pearson J, et al. Risk factors for  
50 late-life suicide: a prospective, community-based study. *Am J Geriatr Psychiatry*  
51 2002;10(4):398-406.
- 52 27. Crocker L, Clare L, Evans K. Giving up or finding a solution? The experience of  
53 attempted suicide in later life. *Ageing Ment Health* 2006;10(6):638-47.
- 54 28. van der Laan N, Schimmel A, Heeren T. The applicability and the inter-rater reliability of  
55 the Comprehensive Psychopathological Rating Scale in an elderly clinical population.  
56 *Int J Geriatr Psychiatry* 2005;20(1):35-40

1  
2  
3  
4  
5  
6  
7  
8  
9  
10  
11  
12  
13  
14  
15  
16  
17  
18  
19  
20  
21  
22  
23  
24  
25  
26  
27  
28  
29  
30  
31  
32  
33  
34  
35  
36  
37  
38  
39  
40  
41  
42  
43  
44  
45  
46  
47  
48  
49  
50  
51  
52  
53  
54  
55  
56  
57  
58  
59  
60

For peer review only

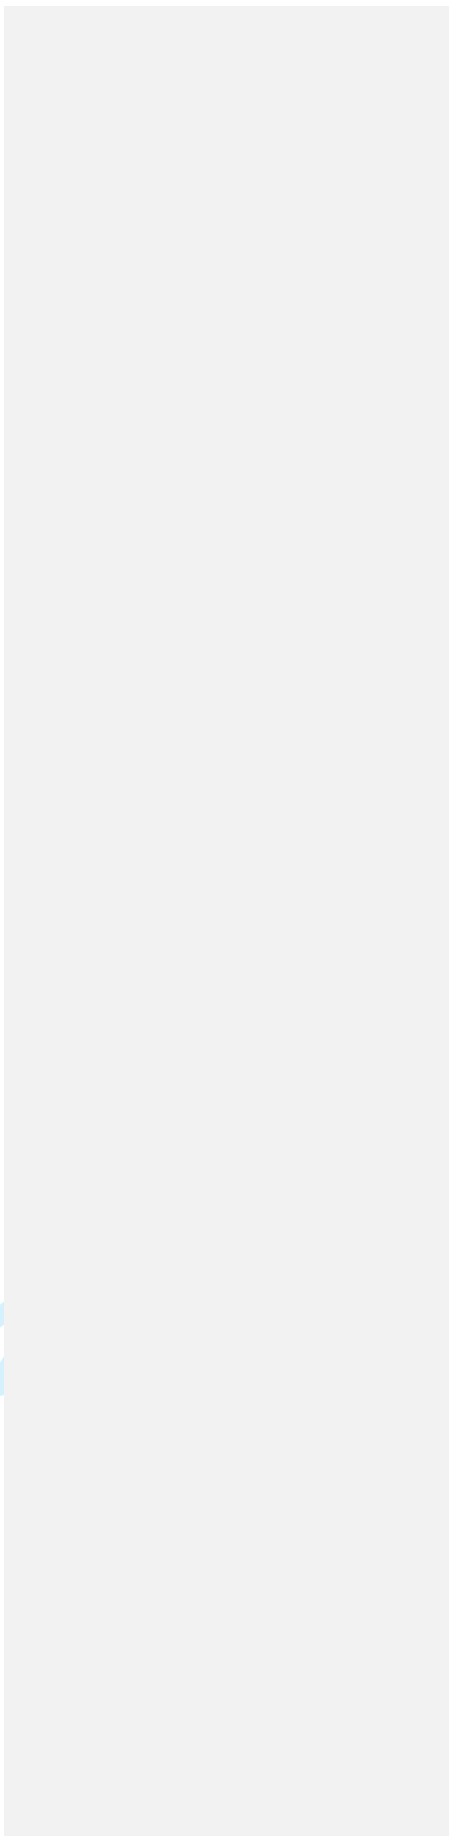

STROBE Statement—Checklist of items that should be included in reports of *cross-sectional studies*

|                              | Item No | Recommendation                                                                                                                                                                                 |
|------------------------------|---------|------------------------------------------------------------------------------------------------------------------------------------------------------------------------------------------------|
| <b>Title and abstract</b>    | 1       | (a) Indicate the study's design with a commonly used term in the title or the abstract<br>p. 1                                                                                                 |
|                              |         | (b) Provide in the abstract an informative and balanced summary of what was done and what was found<br>p. 2                                                                                    |
| <b>Introduction</b>          |         |                                                                                                                                                                                                |
| Background/rationale         | 2       | Explain the scientific background and rationale for the investigation being reported<br>p. 3                                                                                                   |
| Objectives                   | 3       | State specific objectives, including any prespecified hypotheses<br>p. 3                                                                                                                       |
| <b>Methods</b>               |         |                                                                                                                                                                                                |
| Study design                 | 4       | Present key elements of study design early in the paper<br>p. 4                                                                                                                                |
| Setting                      | 5       | Describe the setting, locations, and relevant dates, including periods of recruitment, exposure, follow-up, and data collection<br>p. 4                                                        |
| Participants                 | 6       | (a) Give the eligibility criteria, and the sources and methods of selection of participants<br>p. 4                                                                                            |
| Variables                    | 7       | Clearly define all outcomes, exposures, predictors, potential confounders, and effect modifiers. Give diagnostic criteria, if applicable<br>p. 4-8                                             |
| Data sources/<br>measurement | 8*      | For each variable of interest, give sources of data and details of methods of assessment (measurement). Describe comparability of assessment methods if there is more than one group<br>p. 4-8 |
| Bias                         | 9       | Describe any efforts to address potential sources of bias<br>p. 16                                                                                                                             |
| Study size                   | 10      | Explain how the study size was arrived at<br>p. 4                                                                                                                                              |
| Quantitative variables       | 11      | Explain how quantitative variables were handled in the analyses. If applicable, describe which groupings were chosen and why<br>p. 4-8                                                         |
| Statistical methods          | 12      | (a) Describe all statistical methods, including those used to control for confounding<br>p. 8                                                                                                  |
|                              |         | (b) Describe any methods used to examine subgroups and interactions<br>p. 8                                                                                                                    |
|                              |         | (c) Explain how missing data were addressed<br>p. 4 & 8                                                                                                                                        |
|                              |         | (d) If applicable, describe analytical methods taking account of sampling strategy                                                                                                             |
|                              |         | (e) Describe any sensitivity analyses<br>p. 13                                                                                                                                                 |
| <b>Results</b>               |         |                                                                                                                                                                                                |
| Participants                 | 13*     | (a) Report numbers of individuals at each stage of study—eg numbers potentially                                                                                                                |

|                          |     |                                                                                                                                                                                                                         |
|--------------------------|-----|-------------------------------------------------------------------------------------------------------------------------------------------------------------------------------------------------------------------------|
|                          |     | eligible, examined for eligibility, confirmed eligible, included in the study, completing follow-up, and analysed<br>p. 4                                                                                               |
|                          |     | (b) Give reasons for non-participation at each stage<br>p. 9-15                                                                                                                                                         |
|                          |     | (c) Consider use of a flow diagram                                                                                                                                                                                      |
| Descriptive data         | 14* | (a) Give characteristics of study participants (eg demographic, clinical, social) and information on exposures and potential confounders<br>p. 9                                                                        |
|                          |     | (b) Indicate number of participants with missing data for each variable of interest<br>p. 9                                                                                                                             |
| Outcome data             | 15* | Report numbers of outcome events or summary measures<br>p. 9-15                                                                                                                                                         |
| Main results             | 16  | (a) Give unadjusted estimates and, if applicable, confounder-adjusted estimates and their precision (eg, 95% confidence interval). Make clear which confounders were adjusted for and why they were included<br>p. 9-15 |
|                          |     | (b) Report category boundaries when continuous variables were categorized<br>p. 6-7                                                                                                                                     |
|                          |     | (c) If relevant, consider translating estimates of relative risk into absolute risk for a meaningful time period                                                                                                        |
| Other analyses           | 17  | Report other analyses done—eg analyses of subgroups and interactions, and sensitivity analyses<br>p. 8                                                                                                                  |
| <b>Discussion</b>        |     |                                                                                                                                                                                                                         |
| Key results              | 18  | Summarise key results with reference to study objectives<br>p. 15                                                                                                                                                       |
| Limitations              | 19  | Discuss limitations of the study, taking into account sources of potential bias or imprecision. Discuss both direction and magnitude of any potential bias<br>p. 16-17                                                  |
| Interpretation           | 20  | Give a cautious overall interpretation of results considering objectives, limitations, multiplicity of analyses, results from similar studies, and other relevant evidence<br>p. 15-17                                  |
| Generalisability         | 21  | Discuss the generalisability (external validity) of the study results<br>p. 16-17                                                                                                                                       |
| <b>Other information</b> |     |                                                                                                                                                                                                                         |
| Funding                  | 22  | Give the source of funding and the role of the funders for the present study and, if applicable, for the original study on which the present article is based<br>p. 19                                                  |

\*Give information separately for exposed and unexposed groups.

**Note:** An Explanation and Elaboration article discusses each checklist item and gives methodological background and published examples of transparent reporting. The STROBE checklist is best used in conjunction with this article (freely available on the Web sites of PLoS Medicine at <http://www.plosmedicine.org/>, Annals of Internal Medicine at <http://www.annals.org/>, and Epidemiology at <http://www.epidem.com/>). Information on the STROBE Initiative is available at [www.strobe-statement.org](http://www.strobe-statement.org).



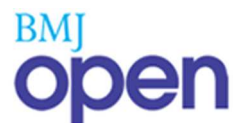

**Suicidal feelings in the twilight of life: A cross-sectional population-based study of 97-year-olds**

|                                 |                                                                                                                                                                                                                                                                                                                                                                                                                                                                                                                                                       |
|---------------------------------|-------------------------------------------------------------------------------------------------------------------------------------------------------------------------------------------------------------------------------------------------------------------------------------------------------------------------------------------------------------------------------------------------------------------------------------------------------------------------------------------------------------------------------------------------------|
| Journal:                        | <i>BMJ Open</i>                                                                                                                                                                                                                                                                                                                                                                                                                                                                                                                                       |
| Manuscript ID:                  | bmjopen-2012-002260.R1                                                                                                                                                                                                                                                                                                                                                                                                                                                                                                                                |
| Article Type:                   | Research                                                                                                                                                                                                                                                                                                                                                                                                                                                                                                                                              |
| Date Submitted by the Author:   | 02-Jan-2013                                                                                                                                                                                                                                                                                                                                                                                                                                                                                                                                           |
| Complete List of Authors:       | Fässberg, Madeleine; Institute of Neuroscience and Physiology, Department of Psychiatry and Neurochemistry<br>Östling, Svante; Institute of Neuroscience and Physiology, Department of Psychiatry and Neurochemistry<br>Börjesson-Hanson, Anne; Institute of Neuroscience and Physiology, Department of Psychiatry and Neurochemistry<br>Skoog, Ingmar; Institute of Neuroscience and Physiology, Department of Psychiatry and Neurochemistry<br>Waern, Margda; Institute of Neuroscience and Physiology, Department of Psychiatry and Neurochemistry |
| <b>Primary Subject Heading</b>: | Epidemiology                                                                                                                                                                                                                                                                                                                                                                                                                                                                                                                                          |
| Secondary Subject Heading:      | Mental health                                                                                                                                                                                                                                                                                                                                                                                                                                                                                                                                         |
| Keywords:                       | Cross Sectional Study, DEPRESSION, Suicide & self-harm < PSYCHIATRY                                                                                                                                                                                                                                                                                                                                                                                                                                                                                   |
|                                 |                                                                                                                                                                                                                                                                                                                                                                                                                                                                                                                                                       |

SCHOLARONE™  
Manuscripts

Only

1  
2  
3 Suicidal feelings in the twilight of life: A cross-sectional population-based study  
4  
5 of 97-year-olds  
6  
7  
8  
9  
10  
11  
12  
13  
14  
15

16 Madeleine Mellqvist Fässberg, M.Sc., Svante Östling, M.D., Ph.D., Anne Börjesson-Hanson,  
17 M.D., Ph.D., Ingmar Skoog, M.D., Ph.D., Margda Wærn, M.D., Ph.D. Neuropsychiatric  
18  
19 Epidemiology Unit, Section for Psychiatry and Neurochemistry, Institute of Neuroscience and  
20  
21 Physiology, Sahlgrenska Academy, University of Gothenburg, Sweden.  
22  
23  
24  
25  
26  
27  
28

29 Correspondence to: Madeleine Mellqvist Fässberg, Neuropsychiatric Epidemiology Unit,  
30  
31 Neuropsychiatry SU/Mölndal, Wallinsgatan 6, SE-431 41 Mölndal, Sweden, +46 31 3438642,  
32  
33 madeleine.mellqvist@neuro.gu.se  
34  
35  
36  
37  
38  
39  
40  
41  
42  
43  
44  
45  
46  
47  
48  
49  
50  
51  
52  
53  
54  
55  
56  
57  
58  
59  
60

Word count: 2889

## Abstract

**Objective** To examine the occurrence of past month suicidal feelings in extreme old age.

Further, to identify factors associated with such feelings.

**Design** Cross-sectional population-based study.

**Setting** Gothenburg, Sweden

**Participants** 269 adults (197 women, 72 men) without dementia born in 1901-1909 who participated in a psychiatric examination.

**Main outcome measures** Death thoughts and suicidal feelings. The later were rated in accordance with the Paykel questions (life not worth living, death wishes, thoughts of taking own life, seriously considered taking own life, attempted suicide) during the past month.

**Results** One quarter of the sample (26.7 %) reported that they thought about their own death at least once a month. Past month thoughts that life was not worth living were acknowledged by 7.9 % of the total sample, death wishes by 10.5 % and thoughts of taking life by 3.8 %. Few had serious thoughts of taking own life (0.8%) and none had attempted suicide. In all, 11.5% acknowledged some level of suicidal feelings. Most (77.4 %) of those who reported such feelings fulfilled criteria for neither major nor minor depression. Neither poor perceived health nor disability (hearing, vision, motor function) were associated with suicidal feelings. Problematic sleep and deficient social contacts were related to suicidal feelings also after adjustment for depression.

**Conclusions** Suicidal feelings may occur outside the context of depression and disability in this age group. Results can inform clinicians who care for persons who reach extreme old age.

## Article summary

### Article focus

- Death wishes and suicidal ideation are common among older adults and have been shown to be associated with mental and physical illness, functional disability and social factors.
- The situation for persons who reach *extreme* old age is less clear.

### Key messages

- While depression was associated with suicidal feelings, three-quarters of those who had such feelings fulfilled criteria for neither major nor minor depression. Screening programs that aim at the identification and treatment of depression may fail to identify persons who have reached extreme old age who could benefit from interventions.
- The results of this study suggest that attention to pain and sleep issues as well as increased opportunities for social contacts might constitute targets for the reduction of suicidal feelings in extreme old age.

### Strengths and limitations of the study

- Strengths of this population-based study include the extreme high age of the participants and the fact that also persons living in institutions were included. Diagnostics were based on face-to-face interviews with clinicians trained in the use of a structured instrument for the rating of psychiatric symptoms.
- This is a cross-sectional study and we can therefore not draw conclusions regarding causality. Associations may be bidirectional.

- Although this is largest population-based study performed in extreme old age, some subgroups are small which is reflected by the large confidence intervals.

## Introduction

Later life is a time of many losses for the individual, and this might help to explain the fact that high rates of suicide are observed in older adults.<sup>1</sup> As populations age, clinicians can be expected to more frequently encounter persons with death wishes and thoughts of suicide. Prevalence rates of suicidal ideation in population-based studies that focus specifically on older age groups range from 2-16%.<sup>2-6</sup> The phenomenon is even more pronounced in the nursing home setting.<sup>7</sup> Risk factors for suicidal ideation and behaviour in later life include mental and physical illness, functional disability and social factors.<sup>8,9</sup> However, surprisingly little is known about these phenomena in *extreme* old age. Persons who reach their upper nineties represent a survival population and findings regarding suicidal feelings in “younger” older samples may prove to be of less relevance here. One might expect that thoughts about death common are common at an age when natural death is imminent. But how common are suicidal feelings in those whose lives span over almost a century? Do such feelings arise in the context of depression and disability, as in younger age groups? How salient are social factors?

The first aim of this study was to estimate the frequency of death thoughts and suicidal feelings in a total population cohort of 97-year-olds without dementia. The second aim was to identify factors associated with suicidal feelings.

## Methods

### *Study participants*

The study is part of the Gothenburg 95+ study which focuses on mental health in very late life.<sup>10</sup> All persons living in Gothenburg, Sweden who reached the age of 97 years at some point during the period 1998 through 2007 (N=973, 817 women, 156 men) were invited to participate. Names and addresses were obtained from the Swedish Population Register. Both persons living at home and in institutions were included. Forty-eight persons died before they could be contacted, eight persons were excluded due to insufficient knowledge of the Swedish language, four had emigrated, and two could not be traced, leaving 911 persons eligible for inclusion (764 women, 147 men). A total of 591 (484 women, 107 men) agreed to participate (or, in cases with severe cognitive impairment, had proxy consent via next-of-kin). The overall response rate was 64.9 %. As previously reported,<sup>11</sup> 2-year mortality rates were similar in participants (52.8 %) and non-participants (50.9 %). Persons who received a research diagnosis of dementia (n=322, see procedure below) were excluded from the current study, leaving 269 individuals (197 women, 72 men).

### *Procedure*

Participants were examined by a psychiatrist/psychiatric nurse/research psychologist during two home visits. A detailed description of procedures was recently reported.<sup>11</sup> The structured examination included physical and neuropsychiatric examinations, history of previous and current disorders, prescription drug use, and assessments of activities of daily living and social factors. Participants were asked to identify a close relative who could give collateral information and these were contacted for a telephone interview.

### *Neuropsychological examination*

The neuropsychological examination included the Swedish version of the Mini Mental State Examination (MMSE),<sup>12</sup> as well as tests of short- and long term memory, abstract thinking,

1  
2  
3 aphasia, apraxia, and agnosia. Results from the examination and from the interview with next-  
4  
5 of-kin were used to make dementia diagnoses in accordance with DSM III-R.<sup>13</sup> For the  
6  
7 purpose of this study, a research diagnosis of dementia was used as an exclusion criterion  
8  
9 only.

### 10 11 12 *Psychiatric examination*

13  
14  
15 The semi-structured examinations included ratings of psychiatric signs and symptoms during  
16  
17 the preceding month in accordance with the Comprehensive Psychopathological Rating Scale  
18  
19 (CPRS).<sup>14</sup> Participants were asked how often they thought of their own death (never,  
20  
21 occasionally, more frequently than once a month, more frequently than once a week, several  
22  
23 times per week, daily). For the purpose of this paper, a person who acknowledged thoughts of  
24  
25 own death more often than once a month was considered to have frequent thoughts of death.  
26  
27 Thoughts about life-weariness, death wishes and suicide thoughts were rated according to  
28  
29 Paykel and colleagues<sup>15</sup> using the following questions: (1) Have you ever felt that life was not  
30  
31 worth living? (2) Have you ever wished you were dead-for instance, that you could go to  
32  
33 sleep and not wake up? (3) Have you ever thought of taking your life, even if you would not  
34  
35 really do it? (4) Have you ever reached the point where you seriously considered taking your  
36  
37 life, or perhaps made plans how you would go about doing it? (5) Have you ever attempted to  
38  
39 take your life? The most recent time any of these thoughts had occurred was noted. In this  
40  
41 study, responses regarding the past month were used, in order to coincide with measures  
42  
43 employed for psychiatric symptoms and signs. A person who responded “yes” to any of the  
44  
45 five Paykel questions regarding the past month was considered to have suicidal feelings.  
46  
47  
48  
49  
50

### 51 52 *Sleep*

53  
54  
55 Participants were asked if they were satisfied with their sleep (no/yes). A person who scored  
56  
57  $\geq 4$  on the CPRS *Reduced sleep* item was considered to have reduced sleep. Correspondingly,  
58  
59  
60

1  
2  
3 a score  $\geq 4$  on the *increased sleep* item was used to define *Increased sleep*. Participants were  
4  
5 asked if they had *difficulties initiating sleep* which was defined as  $> \frac{1}{2}$  hour latency, and if  
6  
7 they experienced problems with *early morning awakening*. An estimation of total hours of  
8  
9 sleep per 24-hour period was made based on responses concerning times of sleep initiation  
10  
11 and awakening for both night time sleep and naps.  
12

### 13 14 15 *Health*

16  
17 Questions regarding sudden onset of focal symptoms or acute aphasia, symptom duration and  
18  
19 admission to hospital due to Stroke/TIA were asked both during the self-report examination  
20  
21 and close-informant interview. The Swedish Hospital Discharge register also provided  
22  
23 diagnoses of stroke and TIA. Only cases with evidence of focal symptoms (i.e. paresis or  
24  
25 aphasia) as documented by any of the above sources were considered to have stroke/TIA.<sup>11</sup>  
26  
27

28  
29 *Hearing impairment* was defined as deafness or a hearing defect which disturbed conversation  
30  
31 during the interview despite hearing aid use. *Vision impairment* was defined as blindness or a  
32  
33 defect which made some of the examination tasks impossible to perform despite own glasses  
34  
35 or use of magnifying glass.  
36  
37

38  
39 For the purpose of this study, a person was considered to have aches and pains when scoring  
40  
41  $\geq 4$  on the CPRS pain item, corresponding to *long-standing and disturbing aches or pains*,  
42  
43 *need for pain relief*, or *intensive disabling pains*.  
44  
45

46  
47 For participants born in 1905-1909 (n=166), a question was added *How do you perceive your*  
48  
49 *current health?* Responses were dichotomised as follows: good (fairly good/good/very good)  
50  
51 and poor (fairly poor/poor/very poor).  
52

### 53 54 55 *Motor functions*

56  
57  
58  
59  
60



1  
2  
3 Six different motor functions (dressing, eating, physical activity, spontaneous activity,  
4 personal hygiene, and control of bladder and bowel) were examined in accordance with the  
5 Gottfries-Bråne-Steen scale (GBS).<sup>16</sup> This instrument has shown high reliability and  
6 validity.<sup>17</sup> Each item is rated from 0 (normal function) to 6 (maximal disturbance), yielding a  
7 maximum score of 36.  
8  
9

### 10 11 12 13 14 *Religiosity*

15  
16  
17 Participants were asked if they considered themselves to be religious (no/yes). Further, a  
18 person was considered “actively religious” if they attended services or followed services by  
19 radio or TV.  
20  
21  
22  
23

### 24 *Social factors*

25  
26  
27 Detailed data on social factors were available for the subgroup born 1905-1909 (n=166). All  
28 of the following items were dichotomized (no/yes): Do you have a confidant? Do you have  
29 more than one confidant? Do you feel that you spend too little time with your children? Your  
30 grandchildren? With friends and acquaintances? With neighbours? Do you spend less time  
31 with friends and family than before retirement? Do you feel lonely?<sup>18</sup>  
32  
33  
34  
35  
36  
37  
38  
39  
40

### 41 *Diagnostics*

42  
43  
44 Psychiatric diagnoses were made in accordance with the Diagnostic and Statistical Manual of  
45 Mental Disorders, Third Edition, Revised (DSM-III-R),<sup>19</sup> as described previously.<sup>13</sup> Minor  
46 depression was diagnosed in accordance with DSM-IV research criteria.<sup>20</sup> Due to lack of  
47 information, we disregarded the six month duration criteria of psychotic symptoms for  
48 diagnosis of schizophrenia. We used a hierarchical diagnostic scheme.<sup>10</sup> Depression (major  
49 depression, minor depression) or Generalized Anxiety Disorder (GAD) was not diagnosed if a  
50 psychotic disorder was present. GAD was not diagnosed if major depression was present.  
51  
52  
53  
54  
55  
56  
57  
58  
59  
60

1  
2  
3 Diagnostic entities were merged for analyses regarding psychiatric illnesses. Schizophrenia  
4 and schizophreniform disorders were treated as one entity, *psychotic disorder*. This disorder  
5 also included Delusional disorder and Psychotic disorder not otherwise specified (NOS).  
6  
7 Major and minor depression were merged into *any depression*. Anxiety disorder included  
8  
9  
10  
11  
12  
13  
14  
15  
16  
17  
18  
19  
20  
21  
22  
23  
24  
25  
26  
27  
28  
29  
30  
31  
32  
33  
34  
35  
36  
37  
38  
39  
40  
41  
42  
43  
44  
45  
46  
47  
48  
49  
50  
51  
52  
53  
54  
55  
56  
57  
58  
59  
60

Diagnostic entities were merged for analyses regarding psychiatric illnesses. Schizophrenia and schizophreniform disorders were treated as one entity, *psychotic disorder*. This disorder also included Delusional disorder and Psychotic disorder not otherwise specified (NOS). Major and minor depression were merged into *any depression*. Anxiety disorder included GAD and phobic disorder (agoraphobia/social phobia/simple phobia).

### *Statistical Analysis*

The t-test was used to test differences in means.  $\chi^2$  and Fisher's exact test were employed to analyze differences in proportions. Due to the relatively small number of participants in some subgroups, exact logistic regression was used to analyze associations of interest. All independent variables that showed significant associations with suicidal feelings in the bivariate exact logistic regression analyses were analyzed in separate multivariate exact logistic regression models, adjusting for sex and any depression. Three-year mortality was calculated from date of examination, utilizing dates of death obtained from the Swedish Population Register. Statistical analyses were performed with IBM SPSS Statistics, version 20 for Windows and SAS 9.2. Results were considered significant when  $p < 0.05$ .

## **Results**

Demographic and diagnostic characteristics of the study sample are shown in Table 1. The proportion reporting thoughts about own death more than once a month was 26.7 %. One out of ten participants reported that they had experienced some level of suicidal feelings during the last month, and this was more common in women (Table 2). No sex difference could be shown regarding one month frequencies of thoughts that life was not worth living, but death wishes were more often endorsed by women. Thoughts of taking one's own life were reported

by 3.8 %. Serious consideration of taking life was rare (0.8 %). None of the participants had attempted suicide during the past month.

Table 1. Demographic and diagnostic characteristics in a population sample of 97-year-olds without dementia (n=269).

|                                 | n       | %    |
|---------------------------------|---------|------|
| <b>Demographics</b>             |         |      |
| Female                          | 197/269 | 73.2 |
| Education beyond mandatory      | 109/189 | 57.6 |
| Living in an institution        | 77/266  | 28.9 |
| <b>Partner status (current)</b> |         |      |
| Partner                         | 10/266  | 3.8  |
| Divorced                        | 12/266  | 4.5  |
| Widowed                         | 208/266 | 78.2 |
| Always single                   | 36/266  | 13.5 |
| <b>Psychiatric disorders</b>    |         |      |
| Any depression                  | 22/269  | 8.2  |
| Major depression                | 8/269   | 3.0  |
| Minor depression                | 14/269  | 5.2  |
| Anxiety disorder                | 16/269  | 5.9  |
| Generalized anxiety disorder    | 8/269   | 3.0  |
| Phobic disorder                 | 9/269   | 3.3  |
| Psychotic disorder              | 12/269  | 4.5  |
| Schizophrenia                   | 6/269   | 2.2  |
| Psychotic disorder NOS          | 6/269   | 2.2  |

Table 2. One-month frequency of suicidal feelings<sup>a</sup> in a population sample of 97-year-olds without dementia, by sex (n=269).

|                                       | Women  |      | Men  |     | Total  |      | P <sup>b</sup> |
|---------------------------------------|--------|------|------|-----|--------|------|----------------|
|                                       | n=197  | %    | n=72 | %   | n=269  | %    |                |
| Any suicidal feelings                 | 27/197 | 13.7 | 4/72 | 5.6 | 31/269 | 11.5 | <b>0.045</b>   |
| Thought that life is not worth living | 17/196 | 8.7  | 4/70 | 5.7 | 21/266 | 7.9  | 0.308          |
| Death wishes                          | 25/196 | 12.8 | 3/70 | 4.3 | 28/266 | 10.5 | <b>0.033</b>   |
| Thought of taking own life            | 9/194  | 4.6  | 1/70 | 1.4 | 10/264 | 3.8  | 0.206          |
| Seriously considered taking own life  | 1/194  | 0.5  | 1/70 | 1.4 | 2/264  | 0.8  | 0.461          |
| Attempted suicide                     | 0/194  | (-)  | 0/70 | (-) | 0/264  | (-)  |                |

Note: <sup>a</sup> According to Paykel.<sup>15</sup> <sup>b</sup> sex differences, in accordance with Fisher's exact test.

### *Associations with suicidal feelings*

Frequent thoughts of death were more common among individuals reporting suicidal feelings than those without such feelings (70.0 % vs. 21.2 %, p=0.000). Over a quarter of those who never had a spouse/partner reported suicidal feelings, and there was a significant association with suicidal feelings (Table 3). Individuals reporting suicidal feelings were less likely to have children than those without such feelings. Living in an institution was not associated with suicidal feelings.

Table 3 shows further that while depression was more than three times more common among participants with suicidal feelings than in those without, most of those who reported suicidal feelings fulfilled criteria for neither major nor minor depression. No association could be found with anxiety disorder or psychotic disorder. Few had a history of psychiatric inpatient or outpatient care and proportions were similar in those with and without suicidal feelings (3.2 % vs. 3.8 % p=0.677). Mean MMSE scores were almost identical in participants with and without suicidal feelings (25.23 vs.25.72, 95 % CI -0.99-1.96, p=0.519).

Table 3 shows further that nearly 90 % of those reporting suicidal feelings were dissatisfied with sleep, compared to two-thirds of those without such feelings. Problematic sleep initiation was more common among those with suicidal feelings. However, the mean number of hours of sleep reported per day was similar among participants with and without suicidal feelings (7.7 vs. 7.8 (95 % CI -0.71-0.87, p=0.836)). Nearly 23 % of those with suicidal feelings had a history of stroke/TIA, and the proportion was similar in those who did not report such feelings. Forty per cent of those with suicidal feelings reported aches and pains, a proportion significantly greater than that in the group without suicidal feelings. None of the participants in the total group rated their health as very poor and only 13 % perceived their current health as rather poor/poor. No difference could be found between those with and without suicidal feelings.

Over one third of the sample had a hearing impairment and more than one quarter had vision impairment. However, no difference could be found between those with and without suicidal feelings in regards to these impairments. No difference in mean motor GBS-score could be shown between those with and without suicidal feelings (5.0 vs. 3.8, 95 % CI -3.23-0.80, p=0.236). Over half of the participants died within three years; there was no significant difference in proportions between those with and without suicidal feelings (64.5 % vs. 50.8 %, p=0.106).

Table 3. Associations with past month suicidal feelings<sup>a</sup> (n=269).

|                            | Suicidal feelings |      | No suicidal feelings |      | P <sup>b</sup> |
|----------------------------|-------------------|------|----------------------|------|----------------|
|                            | n=31              | %    | n=238                | %    |                |
| <b>Demographics</b>        |                   |      |                      |      |                |
| Education beyond mandatory | 9/20              | 45.0 | 100/169              | 59.2 | 0.447          |

|                                    |       |      |         |      |              |
|------------------------------------|-------|------|---------|------|--------------|
| Living in an institution           | 11/30 | 36.7 | 66/236  | 28.0 | 0.216        |
| <b>Partner status (current)</b>    |       |      |         |      |              |
| Partner                            | 0/31  | (-)  | 10/235  | 4.3  |              |
| Divorced                           | 2/31  | 6.5  | 10/235  | 4.5  | 0.418        |
| Widow/widower                      | 21/29 | 67.7 | 187/235 | 79.6 | 0.105        |
| Always been single                 | 8/31  | 25.8 | 28/235  | 11.9 | <b>0.039</b> |
| Children                           | 10/31 | 32.3 | 126/234 | 53.8 | <b>0.019</b> |
| <b>Life events</b>                 |       |      |         |      |              |
| Death of a parent before age 16    | 5/22  | 22.7 | 26/167  | 15.6 | 0.280        |
| Death among children/grandchildren | 8/18  | 44.4 | 40/166  | 24.1 | 0.061        |
| <b>Religion</b>                    |       |      |         |      |              |
| Religious                          | 18/30 | 60.0 | 133/236 | 56.4 | 0.430        |
| Active religiously                 | 12/30 | 40.0 | 91/236  | 38.6 | 0.514        |
| <b>Psychiatric disorders</b>       |       |      |         |      |              |
| Any depression                     | 7/31  | 22.6 | 15/238  | 6.3  | <b>0.007</b> |
| Anxiety disorder                   | 4/31  | 12.9 | 12/238  | 5.0  | 0.097        |
| Psychotic disorder                 | 1/31  | 3.2  | 11/238  | 4.6  | 0.587        |
| <b>Sleep</b>                       |       |      |         |      |              |
| Dissatisfied with sleep            | 26/30 | 86.7 | 153/233 | 65.7 | <b>0.013</b> |
| Reduced sleep                      | 6/28  | 21.4 | 34/233  | 14.6 | 0.242        |
| Difficulties initiating sleep      | 22/30 | 73.3 | 103/235 | 43.8 | <b>0.002</b> |
| Early morning awakening            | 5/30  | 16.7 | 22/235  | 9.4  | 0.174        |
| Increased sleep                    | 1/28  | 3.6  | 3/233   | 1.3  | 0.367        |
| <b>Health</b>                      |       |      |         |      |              |
| Stroke/TIA                         | 7/31  | 22.6 | 37/238  | 15.5 | 0.224        |
| Aches and pains                    | 12/29 | 41.4 | 58/237  | 24.5 | <b>0.046</b> |
| Poor perceived health              | 3/13  | 23.1 | 12/93   | 12.9 | 0.270        |
| <b>Impairments</b>                 |       |      |         |      |              |
| Hearing impairment                 | 10/30 | 33.3 | 88/238  | 37.0 | 0.431        |
| Vision impairment                  | 8/31  | 25.8 | 69/238  | 29.0 | 0.447        |

Note: <sup>a</sup> According to Paykel. <sup>b</sup> In accordance with Fisher's exact test.

*Results of regression analyses*

Table 4 shows results of regression analyses. Never having children was associated with suicidal feelings. However, this association did not remain in the adjusted analysis.

Depression was associated with a four-fold increase in odds of having suicidal feelings, and the association remained after adjusting for sex. As suicidal ideation is a symptom of depression, we reanalysed data after removing this symptom from the diagnostic algorithm.

This did not affect our results. Both dissatisfaction with sleep and difficulties initiating sleep were associated with a more than three-fold increase in odds of having suicidal feelings.

However, after adjusting for sex and depression, only difficulties initiating sleep remained an independent determinant.

Table 4. Results of separate exact logistic regression models showing odds of having past month suicidal feelings<sup>a</sup> (n=269).

|                                            | Crude           |           |              | Adjusted          |           |              |
|--------------------------------------------|-----------------|-----------|--------------|-------------------|-----------|--------------|
|                                            | OR <sup>b</sup> | 95 % CI   | p            | OR <sup>c</sup>   | 95 % CI   | p            |
| Sex                                        | 2.69            | 0.89-11.0 | 0.089        |                   |           |              |
| Always been single <sup>d</sup>            | 2.56            | 0.90-6.67 | 0.078        |                   |           |              |
| Children <sup>e</sup>                      | 0.41            | 0.16-0.96 | <b>0.037</b> | 0.47              | 0.18-1.11 | 0.091        |
| Any depression                             | 4.30            | 1.35-12.6 | <b>0.013</b> | 3.79 <sup>f</sup> | 1.18-11.2 | <b>0.025</b> |
| Dissatisfied with sleep <sup>g</sup>       | 3.39            | 1.12-13.8 | <b>0.026</b> | 3.02              | 0.99-12.4 | 0.053        |
| Difficulties initiating sleep <sup>h</sup> | 3.51            | 1.43-9.50 | <b>0.004</b> | 3.52              | 1.41-9.73 | <b>0.004</b> |
| Aches and pains <sup>i</sup>               | 2.17            | 0.89-5.16 | 0.091        |                   |           |              |

Note: <sup>a</sup> According to Paykel.<sup>15</sup> <sup>b</sup> Bivariate exact logistic regression. <sup>c</sup> Separate exact logistic regression, adjusted for sex and any depression. <sup>d</sup> Missing value for 3 subjects. <sup>e</sup> Missing value for 4 subjects. <sup>f</sup> Adjusted for sex. <sup>g</sup> Missing value for 6 subjects. <sup>h</sup> Missing value for 4 subjects. <sup>i</sup> Missing value for 3 subjects.

### *Suicidal feelings and social factors*

Detailed data regarding social interactions were available for participants born in 1905-1909 (Table 5). Reports of too little time spent with friends and acquaintances and too little time spent with neighbours were associated with suicidal feelings (Table 6). The same was the case for reports of perceived loneliness. Too little time spent with friends and acquaintances and too little time spent with neighbours remained significant in separate regression models adjusted for sex and depression. The strongest association was found between spending too little time with friends and acquaintances, which yielded a more than six-fold increase in odds in the adjusted model.

Table 5. Social characteristics in participants with and without past month suicidal feelings<sup>a</sup> (n=166<sup>b</sup>).

|                                                                | Suicidal Feelings |      | No Suicidal Feelings |      | p            |
|----------------------------------------------------------------|-------------------|------|----------------------|------|--------------|
|                                                                | n=19              | %    | n=147                | %    |              |
| Has a confidant                                                | 13/18             | 72.2 | 105/141              | 74.5 | 0.517        |
| More than one confidant                                        | 6/17              | 35.3 | 59/135               | 43.7 | 0.348        |
| Too little time spent with children                            | 5/10              | 50.0 | 18/104               | 17.3 | <b>0.027</b> |
| Too little time spent with grandchildren                       | 2/9               | 22.2 | 21/101               | 20.8 | 0.600        |
| Too little time spent with friends and acquaintances           | 8/16              | 50.0 | 18/127               | 14.2 | <b>0.002</b> |
| Too little time spent with neighbours                          | 6/18              | 33.3 | 11/138               | 8.0  | <b>0.006</b> |
| Less time spent with friends and family than before retirement | 8/16              | 50.0 | 72/167               | 25.2 | <b>0.041</b> |
| Perceived loneliness                                           | 12/18             | 66.7 | 45/139               | 32.4 | <b>0.006</b> |

Note: <sup>a</sup> According to Paykel. <sup>b</sup> Data available for participants born 1905-1909 only.

Table 6. Results of separate exact logistic regression models showing the association between social characteristics and past month suicidal feelings<sup>a</sup> (n=166<sup>b</sup>).

|  | Crude | Adjusted |
|--|-------|----------|
|--|-------|----------|



|                                                                             | OR <sup>c</sup> | 95 % CI   | p            | OR <sup>d</sup> | 95 % CI   | p            |
|-----------------------------------------------------------------------------|-----------------|-----------|--------------|-----------------|-----------|--------------|
| Too little time spent with children <sup>e</sup>                            | 4.69            | 0.97-22.8 | 0.054        |                 |           |              |
| Too little time spent with neighbours <sup>f</sup>                          | 5.67            | 1.46-20.7 | <b>0.011</b> | 5.00            | 1.10-20.9 | <b>0.036</b> |
| Too little time spent with friends and acquaintances <sup>g</sup>           | 5.94            | 1.71-20.9 | <b>0.004</b> | 6.61            | 1.59-29.9 | <b>0.007</b> |
| Less time spent with friends and family than before retirement <sup>h</sup> | 2.94            | 0.88-9.83 | 0.082        |                 |           |              |
| Perceived loneliness <sup>i</sup>                                           | 4.14            | 1.33-14.3 | <b>0.011</b> | 3.33            | 0.98-12.3 | 0.053        |

Note: <sup>a</sup> According to Paykel. <sup>b</sup> Data available for participants born 1905-1909 only. <sup>c</sup> Bivariate exact logistic regression. <sup>d</sup> Separate exact multivariate logistic regression, adjusted for sex and any depression. <sup>e</sup> Missing value for 52 subjects. <sup>f</sup> Missing value for 10 subjects. <sup>g</sup> Missing value for 23 subjects. <sup>h</sup> Missing value for 23 subjects. <sup>i</sup> Missing value for 9 subjects.

## Discussion

To our knowledge, this is the first population-based study to examine thoughts of death and suicidal feelings in extreme old age. While depression was associated with suicidal feelings, three-quarters of those who had such feelings fulfilled criteria for neither major nor minor depression. Social factors were strong determinants of suicidal feelings.

Difficulties initiating sleep was associated with suicidal feelings even after depression was taken into consideration, which parallels findings from a population study that included “younger” older persons.<sup>21</sup> However, it is important to stress that conclusions regarding causality cannot be drawn from cross-sectional studies. The association may be bidirectional. The wish to die may keep the individual awake, and problematic sleep may lead to a wish to die.

Somewhat unexpectedly, we could not show relationships with several health-related factors. Physical disability has been shown to associate with both suicidal feelings<sup>21</sup> and death by suicide<sup>22</sup> in younger populations. Most participants in the current study reported good to very good health. This is a unique population sample consisting of cognitively relatively intact persons who have reached extreme old age. One might argue that results might be inflated by

1  
2  
3 a tendency for persons in poor health to refuse participation to a greater extent than those in  
4 better health. However, our attrition analysis regarding mortality suggests that this is not the  
5 case. Another possibility is that individual perceptions of health and quality of life shift in the  
6  
7  
8  
9  
10 “oldest old”,<sup>23</sup> which could render health factors of less importance in explaining suicidal  
11 feelings in extreme high age.  
12

13  
14 A more than six-fold increase in odds of suicidal feelings was observed in the context of  
15 unsatisfactory frequency of social contacts. The literature on social factors and suicidal  
16 behaviour in older people is extremely limited.<sup>24</sup> Number and frequency of contacts have been  
17 reported in only a couple of studies.<sup>25 26</sup> The approach used in the current study allowed  
18 participants to give a subjective view of their social relations. This is important as also  
19 persons who are not socially isolated may feel detached from the community.<sup>27</sup>  
20  
21  
22  
23  
24  
25  
26  
27  
28  
29  
30  
31

### 32 *Methodological considerations*

33  
34  
35 Strengths of the study include the extreme high age of the participants and the fact that also  
36 persons living in institutions were included in this population-based study. Diagnostics were  
37 based on face-to-face interviews with clinicians trained in the use of a structured instrument  
38 for the rating of psychiatric symptoms. The CPRS has been shown to have good reliability  
39 and validity in elderly clinical samples.<sup>28</sup> Questions regarding death wishes and suicidal  
40 thoughts might be perceived as sensitive by some participants. Reporting suicidal feelings to  
41 an experienced psychiatrist, psychiatric nurse, or psychologist might be easier than to a lay  
42 interviewer. It should be pointed out that the Paykel questions encompass a broad range of  
43 phenomena and feelings of weariness of life and death wishes were far more common than  
44 serious suicidal ideation. Although this is the largest population-based study performed in  
45 extreme old age, the number of persons who seriously considered taking their lives during the  
46  
47  
48  
49  
50  
51  
52  
53  
54  
55  
56  
57  
58  
59  
60

1  
2  
3 past month was not large enough to allow for separate analyses. The problem of study power  
4  
5 is further reflected by the large confidence intervals observed for some of the analyses.  
6  
7 Failure to show significance, for example regarding the regression model involving aches and  
8  
9 pains may be due to study size. Finally, while the response rate (65 %) was fairly good  
10  
11 considering the age group, it is possible that persons with suicidal feelings may have declined  
12  
13 participation to a greater extent than those without such feelings. While this would result in an  
14  
15 underestimation of past month suicidal feelings it is unclear how this might have impacted on  
16  
17 the associations studied.  
18  
19

### 20 21 22 23 24 *Implications*

25  
26  
27 Screening programs that aim at the identification and treatment of depression may fail to  
28  
29 identify persons who reached extreme old age who could benefit from interventions. The  
30  
31 results of this study suggest that attention to pain and sleep issues as well as increased  
32  
33 opportunities for social contacts might constitute targets for the reduction of suicidal feelings  
34  
35 in very late life.  
36  
37  
38  
39  
40  
41

### 42 **Acknowledgements**

43  
44  
45 The authors thank all study participants and co-workers at the Neuropsychiatric Epidemiology  
46  
47 Unit. A special thank you to Thomas Marlow and Erik Joas for consultation regarding  
48  
49 statistics.  
50  
51  
52  
53  
54

55 **Contributors** MMF analyzed and interpreted the data and drafted the manuscript. SÖ, ABH  
56  
57 and IS interpreted the data and critically revised the manuscript. IS was responsible for  
58  
59  
60

1  
2  
3 planning the study and data collection. MW was responsible for supervision, drafted and  
4  
5 critically revised the manuscript and interpreted the data. She is the guarantor of the study.  
6

7 **Funding** The study was made possible by grants from The Swedish Research Council 11267,  
8  
9 2005-8460, 825-2007-7462, 2008-7245-5895-70, 2009-62X-21079-01-3, The Swedish  
10  
11 Council for Working Life and Social Research (no 2001-2835, no 2001-2849, 2005-0762,  
12  
13 2008-1210, Epilife 2006-1506), Stiftelsen Söderström-Königska Sjukhemmet, Stiftelsen  
14  
15 Gamla Tjänarinnor, Bror Gadelius Foundation, Hjalmar Svenssons Foundation, Swedish  
16  
17 Brain Power, The Alzheimer's Association (IIRG-03-6168, ZEN-01-3151) and the Bank of  
18  
19 Sweden Tercentenary Foundation.  
20  
21

22 **Competing interests** None declared.  
23

24 **Ethical approval** The Ethics Review Board at the University of Gothenburg approved the  
25  
26 study. All participants were informed of their right to withdraw from the study at any time.  
27  
28 Written consent was obtained. Among participants with clinical dementia, proxy informed  
29  
30 consent was also obtained from a next of kin. All interviews were performed by highly  
31  
32 experienced psychiatrists/psychiatric nurses/research psychologists. When a respondent  
33  
34 reported serious suicidal ideation or other serious psychopathology the psychiatrist  
35  
36 responsible for the medical study was informed and adequate care was initiated.  
37  
38  
39

40 **Data sharing statement** There are no additional data available.  
41  
42  
43  
44  
45  
46

## 47 **References**

- 48
- 49 1. World Health Organization. Public Health Action for the Prevention of Suicide, 2012.
- 50 2. Jorm A, Henderson A, Scott R, et al. Factors associated with the wish to die in elderly
- 51 people. *Age Ageing* 1995;24(5):389-92.
- 52 3. Skoog I, Aevarsson O, Beskow J, et al. Suicidal feelings in a population sample of
- 53 nondemented 85-year-olds. *Am J Psychiatry* 1996;153(8):1015-20.
- 54 4. Rao R, Denning T, Brayne C, et al. Suicidal thinking in community residents over eighty. *Int*
- 55 *J Geriatr Psychiatry* 1997;12(3):337-43.
- 56  
57  
58  
59  
60

5. Barnow S, Linden M, Freyberger H. The relation between suicidal feelings and mental disorders in the elderly: results from the Berlin Aging Study (BASE). *Psychol Med* 2004;34(4):741-46.
6. Scocco P, Meneghel G, Caon F, et al. Death ideation and its correlates: survey of an over-65-year-old population. *J Nerv Ment Dis* 2001;189(4):210-8.
7. Scocco P, Fantoni G, Rapattoni M, et al. Death ideas, suicidal thoughts, and plans among nursing home residents *J Geriatr Psychiatry Neurol* 2009;22(2):141-48.
8. O'Connell H, Chin A, Cunningham C, et al. Recent developments: suicide in older people. *BMJ* 2004;329(7471):895-9.
9. van Orden K, Conwell Y. Suicides in late life. *Curr Psychiatry Rep* 2011;13(3):234-41.
10. Borjesson-Hanson A, Waern M, Ostling S, et al. One-month prevalence of mental disorders in a population sample of 95-year olds. *Am J of Geriatr Psychiatry* 2011;19(3):284-91.
11. Andersson M, Guo X, Borjesson-Hanson A, et al. A population-based study on dementia and stroke in 97 year olds. *Age Ageing* 2012;41(4):529-33.
12. Folstein M, Robins L, Helzer J. The Mini-Mental State Examination. *Arch Gen Psychiatry* 1983;40(7):812.
13. Skoog I, Nilsson L, Landahl S, et al. Mental disorders and the use of psychotropic drugs in an 85-year-old urban population. *Int Psychogeriatr* 1993;5:33-48.
14. Asberg M, Montgomery S, Perris C, et al. A comprehensive psychopathological rating scale. *Acta Psychiatr Scand Suppl* 1978(271):5-27.
15. Paykel E, Myers J, Lindenthal J, et al. Suicidal feelings in the general population: a prevalence study. *Br J of Psychiatry* 1974;124(0):460-9.
16. Gottfries C, Brane G, Gullberg B, et al. A new rating scale for dementia syndromes. *Arch Gerontol Geriatr* 1982;1(4):311-30.
17. Brane G, Gottfries C, Winblad B. The Gottfries-Brane-Steen scale: validity, reliability and application in anti-dementia drug trials. *Dement Geriatr Cogn Disord* 2001;12(1):1-14.
18. Mellqvist M, Wiktorsson S, Joas E, et al. Sense of coherence in elderly suicide attempters: the impact of social and health-related factors. *Int Psychogeriatr* 2011:1-8.
19. American Psychiatric Association. *Diagnostic and Statistical Manual of Mental Disorders 3rd ed, revised*, 1987.
20. American Psychiatric Association. *Diagnostic and Statistical Manual of Mental Disorders 4th ed.*, 1994.
21. Lapiere S, Boyer R, Desjardins S, et al. Daily hassles, physical illness, and sleep problems in older adults with wishes to die. *Int Psychogeriatr* 2012;24(2):243-52.
22. Kaplan M, McFarland B, Huguet N, et al. Physical illness, functional limitations, and suicide risk: a population-based study. *Am J Orthopsychiatry* 2007;77(1):56-60.
23. Wilhelmson K, Andersson, C., Waern, M., et al. Elderly people's perspectives on quality of life. *Ageing Soc* 2005;25:585-600.
24. Fassberg M, van Orden K, Duberstein P, et al. A systematic review of social factors and suicidal behavior in older adulthood. *Int J Environ Res Public Health* 2012;9(3):722-45.
25. Bartels S, Coakley E, Oxman T, et al. Suicidal and death ideation in older primary care patients with depression, anxiety, and at-risk alcohol use. *Am J Geriatr Psychiatry* 2002;10(4):417-27.
26. Turvey C, Conwell Y, Jones M, et al. Risk factors for late-life suicide: a prospective, community-based study. *Am J Geriatr Psychiatry* 2002;10(4):398-406.
27. Crocker L, Clare L, Evans K. Giving up or finding a solution? The experience of attempted suicide in later life. *Ageing Ment Health* 2006;10(6):638-47.

1  
2  
3  
4  
5  
6  
7  
8  
9  
10  
11  
12  
13  
14  
15  
16  
17  
18  
19  
20  
21  
22  
23  
24  
25  
26  
27  
28  
29  
30  
31  
32  
33  
34  
35  
36  
37  
38  
39  
40  
41  
42  
43  
44  
45  
46  
47  
48  
49  
50  
51  
52  
53  
54  
55  
56  
57  
58  
59  
60

28. van der Laan N, Schimmel A, Heeren T. The applicability and the inter-rater reliability of the Comprehensive Psychopathological Rating Scale in an elderly clinical population. *Int J Geriatr Psychiatry* 2005;20(1):35-40.

For peer review only

1  
2  
3  
4  
5  
6  
7 Suicidal feelings in the twilight of life: A cross-sectional population-based study  
8  
9 of 97-year-olds  
10  
11  
12  
13  
14  
15  
16  
17

18 Madeleine Mellqvist Fässberg, M.Sc., Svante Östling, M.D., Ph.D., Anne Börjesson-Hanson,  
19 M.D., Ph.D., Ingmar Skoog, M.D., Ph.D., Margda Wærn, M.D., Ph.D. Neuropsychiatric  
20  
21  
22 Epidemiology Unit, Section for Psychiatry and Neurochemistry, Institute of Neuroscience and  
23  
24 Physiology, Sahlgrenska Academy, University of Gothenburg, Sweden.  
25  
26  
27

28  
29 Correspondence to: Madeleine Mellqvist Fässberg, Neuropsychiatric Epidemiology Unit,  
30  
31 Neuropsychiatry SU/Mölndal, Wallinsgatan 6, SE-431 41 Mölndal, Sweden, +46 31 3438642,  
32  
33 madeleine.mellqvist@neuro.gu.se  
34  
35  
36  
37  
38  
39  
40

41 Word count: 2889  
42  
43  
44  
45  
46  
47  
48  
49  
50  
51  
52  
53  
54  
55  
56  
57  
58  
59  
60

## Abstract

**Objective** To examine the occurrence of past month suicidal feelings in extreme old age. Further, to identify factors associated with such feelings.

**Design** Cross-sectional population-based study.

**Setting** Gothenburg, Sweden

**Participants** 269 adults (197 women, 72 men) without dementia born in 1901-1909 who participated in a psychiatric examination.

**Main outcome measures** Death thoughts and suicidal feelings. The later were rated in accordance with the Paykel questions (life not worth living, death wishes, thoughts of taking own life, seriously considered taking own life, attempted suicide) during the past month.

**Results** One quarter of the sample (26.7 %) reported that they thought about their own death at least once a month. Past month thoughts that life was not worth living were acknowledged by 7.9 % of the total sample, death wishes by 10.5 % and thoughts of taking life by 3.8 %. Few had serious thoughts of taking own life (0.8%) and none had attempted suicide. In all, 11.5% acknowledged some level of suicidal feelings. Most (77.4 %) of those who reported such feelings fulfilled criteria for neither major nor minor depression. Neither poor perceived health nor disability (hearing, vision, motor function) were associated with suicidal feelings. Problematic sleep and deficient social contacts were related to suicidal feelings also after adjustment for depression.

**Conclusions** Suicidal feelings may occur outside the context of depression and disability in this age group. Results can inform clinicians who care for persons who reach extreme old age.



## Article summary

### Article focus

- Death wishes and suicidal ideation are common among older adults and have been shown to be associated with mental and physical illness, functional disability and social factors.
- The situation for persons who reach *extreme* old age is less clear.

### Key messages

- While depression was associated with suicidal feelings, three-quarters of those who had such feelings fulfilled criteria for neither major nor minor depression. Screening programs that aim at the identification and treatment of depression may fail to identify persons who have reached extreme old age who could benefit from interventions.
- The results of this study suggest that attention to pain and sleep issues as well as increased opportunities for social contacts might constitute targets for the reduction of suicidal feelings in extreme old age.

### Strengths and limitations of the study

- Strengths of this population-based study include the extreme high age of the participants and the fact that also persons living in institutions were included. Diagnostics were based on face-to-face interviews with clinicians trained in the use of a structured instrument for the rating of psychiatric symptoms.
- This is a cross-sectional study and we can therefore not draw conclusions regarding causality. Associations may be bidirectional.

- Although this is largest population-based study performed in extreme old age, some subgroups are small which is reflected by the large confidence intervals.

## Introduction

Later life is a time of many losses for the individual, and this might help to explain the fact that high rates of suicide are observed in older adults.<sup>1</sup> As populations age, clinicians can be expected to more frequently encounter persons with death wishes and thoughts of suicide. Prevalence rates of suicidal ideation in population-based studies that focus specifically on older age groups range from 2-16%.<sup>2-6</sup> The phenomenon is even more pronounced in the nursing home setting.<sup>7</sup> Risk factors for suicidal ideation and behaviour in later life include mental and physical illness, functional disability and social factors.<sup>8,9</sup> However, surprisingly little is known about these phenomena in *extreme* old age. Persons who reach their upper nineties represent a survival population and findings regarding suicidal feelings in “younger” older samples may prove to be of less relevance here. One might expect that thoughts about death common are common at an age when natural death is imminent. But how common are suicidal feelings in those whose lives span over almost a century? Do such feelings arise in the context of depression and disability, as in younger age groups? How salient are social factors?

The first aim of this study was to estimate the frequency of death thoughts and suicidal feelings in a total population cohort of 97-year-olds without dementia. The second aim was to identify factors associated with suicidal feelings.

## Methods

Field Code Changed

### Study participants

The study is part of the Gothenburg 95+ study which focuses on mental health in very late life.<sup>10</sup> All persons living in Gothenburg, Sweden who reached the age of 97 years at some point during the period 1998 through 2007 (N=973, 817 women, 156 men) were invited to participate. Names and addresses were obtained from the Swedish Population Register. Both persons living at home and in institutions were included. Forty-eight persons died before they could be contacted, eight persons were excluded due to insufficient knowledge of the Swedish language, four had emigrated, and two could not be traced, leaving 911 persons eligible for inclusion (764 women, 147 men). A total of 591 (484 women, 107 men) agreed to participate (or, in cases with severe cognitive impairment, had proxy consent via next-of-kin). The overall response rate was 64.9 %. As previously reported,<sup>11</sup> 2-year mortality rates were similar in participants (52.8 %) and non-participants (50.9 %). Persons who received a research diagnosis of dementia (n=322, see procedure below) were excluded from the current study, leaving 269 individuals (197 women, 72 men).

### Procedure

Participants were examined by a psychiatrist/psychiatric nurse/research psychologist during two home visits. A detailed description of procedures was recently reported.<sup>11</sup> The structured examination included physical and neuropsychiatric examinations, history of previous and current disorders, prescription drug use, and assessments of activities of daily living and social factors. Participants were asked to identify a close relative who could give collateral information and these were contacted for a telephone interview.

### Neuropsychological examination

The neuropsychological examination included the Swedish version of the Mini Mental State Examination (MMSE),<sup>12</sup> as well as tests of short- and long term memory, abstract thinking,

Field Code Changed

Field Code Changed

Field Code Changed

Field Code Changed

1  
2  
3  
4  
5  
6  
7  
8  
9  
10  
11  
12  
13  
14  
15  
16  
17  
18  
19  
20  
21  
22  
23  
24  
25  
26  
27  
28  
29  
30  
31  
32  
33  
34  
35  
36  
37  
38  
39  
40  
41  
42  
43  
44  
45  
46  
47  
48  
49  
50  
51  
52  
53  
54  
55  
56  
57  
58  
59  
60

aphasia, apraxia, and agnosia. Results from the examination and from the interview with next-of-kin were used to make dementia diagnoses in accordance with DSM III-R.<sup>13</sup> For the purpose of this study, a research diagnosis of dementia was used as an exclusion criterion only.

Field Code Changed

### *Psychiatric examination*

The semi-structured examinations included ratings of psychiatric signs and symptoms during the preceding month in accordance with the Comprehensive Psychopathological Rating Scale (CPRS).<sup>14</sup> Participants were asked how often they thought of their own death (never, occasionally, more frequently than once a month, more frequently than once a week, several times per week, daily). For the purpose of this paper, a person who acknowledged thoughts of own death more often than once a month was considered to have frequent thoughts of death. Thoughts about life-weariness, death wishes and suicide thoughts were rated according to Paykel and colleagues<sup>15</sup> using the following questions: (1) Have you ever felt that life was not worth living? (2) Have you ever wished you were dead-for instance, that you could go to sleep and not wake up? (3) Have you ever thought of taking your life, even if you would not really do it? (4) Have you ever reached the point where you seriously considered taking your life, or perhaps made plans how you would go about doing it? (5) Have you ever attempted to take your life? The most recent time any of these thoughts had occurred was noted. In this study, responses regarding the past month were used, in order to coincide with measures employed for psychiatric symptoms and signs. A person who responded “yes” to any of the five Paykel questions regarding the past month was considered to have suicidal feelings.

Field Code Changed

Field Code Changed

### *Sleep*

Participants were asked if they were satisfied with their sleep (no/yes). A person who scored  $\geq 4$  on the CPRS *Reduced sleep* item was considered to have reduced sleep. Correspondingly,

1  
2  
3  
4  
5  
6  
7 a score  $\geq 4$  on the *increased sleep* item was used to define *Increased sleep*. Participants were  
8 asked if they had *difficulties initiating sleep* which was defined as  $> \frac{1}{2}$  hour latency, and if  
9 they experienced problems with *early morning awakening*. An estimation of total hours of  
10 sleep per 24-hour period was made based on responses concerning times of sleep initiation  
11 and awakening for both night time sleep and naps.  
12  
13  
14  
15

### 16 *Health*

17  
18 Questions regarding sudden onset of focal symptoms or acute aphasia, symptom duration and  
19 admission to hospital due to Stroke/TIA were asked both during the self-report examination  
20 and close-informant interview. The Swedish Hospital Discharge register also provided  
21 diagnoses of stroke and TIA. Only cases with evidence of focal symptoms (i.e. paresis or  
22 aphasia) as documented by any of the above sources were considered to have stroke/TIA.<sup>11</sup>  
23  
24  
25  
26  
27  
28  
29

30 *Hearing impairment* was defined as deafness or a hearing defect which disturbed conversation  
31 during the interview despite hearing aid use. *Vision impairment* was defined as blindness or a  
32 defect which made some of the examination tasks impossible to perform despite own glasses  
33 or use of magnifying glass.  
34  
35  
36  
37

38 For the purpose of this study, a person was considered to have aches and pains when scoring  
39  $\geq 4$  on the CPRS pain item, corresponding to *long-standing and disturbing aches or pains*,  
40 *need for pain relief, or intensive disabling pains*.  
41  
42  
43  
44

45 For participants born in 1905-1909 (n=166), a question was added *How do you perceive your*  
46 *current health?* Responses were dichotomised as follows: good (fairly good/good/very good)  
47 and poor (fairly poor/poor/very poor).  
48  
49  
50

### 51 *Motor functions*

1  
2  
3  
4  
5  
6  
7 Six different motor functions (dressing, eating, physical activity, spontaneous activity,  
8 personal hygiene, and control of bladder and bowel) were examined in accordance with the  
9 Gottfries-Bråne-Steen scale (GBS).<sup>16</sup> This instrument has shown high reliability and  
10 validity.<sup>17</sup> Each item is rated from 0 (normal function) to 6 (maximal disturbance), yielding a  
11 maximum score of 36.  
12  
13  
14  
15

### 16 *Religiosity*

17  
18 Participants were asked if they considered themselves to be religious (no/yes). Further, a  
19 person was considered “actively religious” if they attended services or followed services by  
20 radio or TV.  
21  
22  
23  
24

### 25 *Social factors*

26  
27 Detailed data on social factors were available for the subgroup born 1905-1909 (n=166). All  
28 of the following items were dichotomized (no/yes): Do you have a confidant? Do you have  
29 more than one confidant? Do you feel that you spend too little time with your children? Your  
30 grandchildren? With friends and acquaintances? With neighbours? Do you spend less time  
31 with friends and family than before retirement? Do you feel lonely?<sup>18</sup>  
32  
33  
34  
35  
36

### 37 *Diagnostics*

38  
39  
40  
41  
42  
43 Psychiatric diagnoses were made in accordance with the Diagnostic and Statistical Manual of  
44 Mental Disorders, Third Edition, Revised (DSM-III-R),<sup>19</sup> as described previously.<sup>13</sup> Minor  
45 depression was diagnosed in accordance with DSM-IV research criteria.<sup>20</sup> Due to lack of  
46 information, we disregarded the six month duration criteria of psychotic symptoms for  
47 diagnosis of schizophrenia. We used a hierarchical diagnostic scheme.<sup>10</sup> Depression (major  
48 depression, minor depression) or Generalized Anxiety Disorder (GAD) was not diagnosed if a  
49 psychotic disorder was present. GAD was not diagnosed if major depression was present.  
50  
51  
52  
53  
54  
55

Field Code Changed

1  
2  
3  
4  
5  
6  
7 Diagnostic entities were merged for analyses regarding psychiatric illnesses. Schizophrenia  
8 and schizophreniform disorders were treated as one entity, *psychotic disorder*. This disorder  
9 also included Delusional disorder and Psychotic disorder not otherwise specified (NOS).  
10  
11 Major and minor depression were merged into *any depression*. Anxiety disorder included  
12  
13 GAD and phobic disorder (agoraphobia/social phobia/simple phobia).  
14  
15  
16  
17

### 18 19 *Statistical Analysis*

20  
21 The t-test was used to test differences in means.  $\chi^2$  and Fisher's exact test were employed to  
22  
23 analyze differences in proportions. Due to the relatively small number of participants in some  
24  
25 subgroups, exact logistic regression was used to analyze associations of interest. All  
26  
27 independent variables that showed significant associations with suicidal feelings in the  
28  
29 bivariate exact logistic regression analyses were analyzed in separate multivariate exact  
30  
31 logistic regression models, adjusting for sex and any depression. Three-year mortality was  
32  
33 calculated from date of examination, utilizing dates of death obtained from the Swedish  
34  
35 Population Register. Statistical analyses were performed with IBM SPSS Statistics, version  
36  
37 20 for Windows and SAS 9.2. Results were considered significant when  $p < 0.05$ .  
38  
39  
40

## 41 **Results**

42  
43 Demographic and diagnostic characteristics of the study sample are shown in Table 1. The  
44  
45 proportion reporting thoughts about own death more than once a month was 26.7 %. One out  
46  
47 of ten participants reported that they had experienced some level of suicidal feelings during  
48  
49 the last month, and this was more common in women (Table 2). No sex difference could be  
50  
51 shown regarding one month frequencies of thoughts that life was not worth living, but death  
52  
53 wishes were more often endorsed by women. Thoughts of taking one's own life were reported  
54  
55  
56  
57  
58  
59  
60

by 3.8 %. Serious consideration of taking life was rare (0.8 %). None of the participants had attempted suicide during the past month.

Table 1. Demographic and diagnostic characteristics in a population sample of 97-year-olds without dementia (n=269).

|                                 | n       | %    |
|---------------------------------|---------|------|
| <b>Demographics</b>             |         |      |
| Female                          | 197/269 | 73.2 |
| Education beyond mandatory      | 109/189 | 57.6 |
| Living in an institution        | 77/266  | 28.9 |
| <b>Partner status (current)</b> |         |      |
| Partner                         | 10/266  | 3.8  |
| Divorced                        | 12/266  | 4.5  |
| Widowed                         | 208/266 | 78.2 |
| Always single                   | 36/266  | 13.5 |
| <b>Psychiatric disorders</b>    |         |      |
| Any depression                  | 22/269  | 8.2  |
| Major depression                | 8/269   | 3.0  |
| Minor depression                | 14/269  | 5.2  |
| Anxiety disorder                | 16/269  | 5.9  |
| Generalized anxiety disorder    | 8/269   | 3.0  |
| Phobic disorder                 | 9/269   | 3.3  |
| Psychotic disorder              | 12/269  | 4.5  |
| Schizophrenia                   | 6/269   | 2.2  |
| Psychotic disorder NOS          | 6/269   | 2.2  |



Table 2. One-month frequency of suicidal feelings<sup>a</sup> in a population sample of 97-year-olds without dementia, by sex (n=269).

|                                       | Women  |      | Men  |     | Total  |      | P <sup>b</sup> |
|---------------------------------------|--------|------|------|-----|--------|------|----------------|
|                                       | n=197  | %    | n=72 | %   | n=269  | %    |                |
| Any suicidal feelings                 | 27/197 | 13.7 | 4/72 | 5.6 | 31/269 | 11.5 | <b>0.045</b>   |
| Thought that life is not worth living | 17/196 | 8.7  | 4/70 | 5.7 | 21/266 | 7.9  | 0.308          |
| Death wishes                          | 25/196 | 12.8 | 3/70 | 4.3 | 28/266 | 10.5 | <b>0.033</b>   |
| Thought of taking own life            | 9/194  | 4.6  | 1/70 | 1.4 | 10/264 | 3.8  | 0.206          |
| Seriously considered taking own life  | 1/194  | 0.5  | 1/70 | 1.4 | 2/264  | 0.8  | 0.461          |
| Attempted suicide                     | 0/194  | (-)  | 0/70 | (-) | 0/264  | (-)  |                |

Note: <sup>a</sup> According to Paykel,<sup>15</sup> <sup>b</sup> sex differences, in accordance with Fisher's exact test.

Field Code Changed

### *Associations with suicidal feelings*

Frequent thoughts of death were more common among individuals reporting suicidal feelings than those without such feelings (70.0 % vs. 21.2 %, p=0.000). Over a quarter of those who never had a spouse/partner reported suicidal feelings, and there was a significant association with suicidal feelings (Table 3). Individuals reporting suicidal feelings were less likely to have children than those without such feelings. Living in an institution was not associated with suicidal feelings.

Table 3 shows further that while depression was more than three times more common among participants with suicidal feelings than in those without, most of those who reported suicidal feelings fulfilled criteria for neither major nor minor depression. No association could be found with anxiety disorder or psychotic disorder. Few had a history of psychiatric inpatient or outpatient care and proportions were similar in those with and without suicidal feelings (3.2 % vs. 3.8 % p=0.677). Mean MMSE scores were almost identical in participants with and without suicidal feelings (25.23 vs.25.72, 95 % CI -0.99-1.96, p=0.519).

Table 3 shows further that nearly 90 % of those reporting suicidal feelings were dissatisfied with sleep, compared to two-thirds of those without such feelings. Problematic sleep initiation was more common among those with suicidal feelings. However, the mean number of hours of sleep reported per day was similar among participants with and without suicidal feelings (7.7 vs. 7.8 (95 % CI -0.71-0.87,  $p=0.836$ )). Nearly 23 % of those with suicidal feelings had a history of stroke/TIA, and the proportion was similar in those who did not report such feelings. Forty per cent of those with suicidal feelings reported aches and pains, a proportion significantly greater than that in the group without suicidal feelings. None of the participants in the total group rated their health as very poor and only 13 % perceived their current health as rather poor/poor. No difference could be found between those with and without suicidal feelings.

Over one third of the sample had a hearing impairment and more than one quarter had vision impairment. However, no difference could be found between those with and without suicidal feelings in regards to these impairments. No difference in mean motor GBS-score could be shown between those with and without suicidal feelings (5.0 vs. 3.8, 95 % CI -3.23-0.80,  $p=0.236$ ). Over half of the participants died within three years; there was no significant difference in proportions between those with and without suicidal feelings (64.5 % vs. 50.8 %,  $p=0.106$ ).

Table 3. Associations with past month suicidal feelings<sup>a</sup> (n=269).

|                            | Suicidal feelings |      | No suicidal feelings |      | p <sup>b</sup> |
|----------------------------|-------------------|------|----------------------|------|----------------|
|                            | n=31              | %    | n=238                | %    |                |
| <b>Demographics</b>        |                   |      |                      |      |                |
| Education beyond mandatory | 9/20              | 45.0 | 100/169              | 59.2 | 0.447          |

|                                    |       |      |         |      |              |
|------------------------------------|-------|------|---------|------|--------------|
| Living in an institution           | 11/30 | 36.7 | 66/236  | 28.0 | 0.216        |
| <b>Partner status (current)</b>    |       |      |         |      |              |
| Partner                            | 0/31  | (-)  | 10/235  | 4.3  |              |
| Divorced                           | 2/31  | 6.5  | 10/235  | 4.5  | 0.418        |
| Widow/widower                      | 21/29 | 67.7 | 187/235 | 79.6 | 0.105        |
| Always been single                 | 8/31  | 25.8 | 28/235  | 11.9 | <b>0.039</b> |
| Children                           | 10/31 | 32.3 | 126/234 | 53.8 | <b>0.019</b> |
| <b>Life events</b>                 |       |      |         |      |              |
| Death of a parent before age 16    | 5/22  | 22.7 | 26/167  | 15.6 | 0.280        |
| Death among children/grandchildren | 8/18  | 44.4 | 40/166  | 24.1 | 0.061        |
| <b>Religion</b>                    |       |      |         |      |              |
| Religious                          | 18/30 | 60.0 | 133/236 | 56.4 | 0.430        |
| Active religiously                 | 12/30 | 40.0 | 91/236  | 38.6 | 0.514        |
| <b>Psychiatric disorders</b>       |       |      |         |      |              |
| Any depression                     | 7/31  | 22.6 | 15/238  | 6.3  | <b>0.007</b> |
| Anxiety disorder                   | 4/31  | 12.9 | 12/238  | 5.0  | 0.097        |
| Psychotic disorder                 | 1/31  | 3.2  | 11/238  | 4.6  | 0.587        |
| <b>Sleep</b>                       |       |      |         |      |              |
| Dissatisfied with sleep            | 26/30 | 86.7 | 153/233 | 65.7 | <b>0.013</b> |
| Reduced sleep                      | 6/28  | 21.4 | 34/233  | 14.6 | 0.242        |
| Difficulties initiating sleep      | 22/30 | 73.3 | 103/235 | 43.8 | <b>0.002</b> |
| Early morning awakening            | 5/30  | 16.7 | 22/235  | 9.4  | 0.174        |
| Increased sleep                    | 1/28  | 3.6  | 3/233   | 1.3  | 0.367        |
| <b>Health</b>                      |       |      |         |      |              |
| Stroke/TIA                         | 7/31  | 22.6 | 37/238  | 15.5 | 0.224        |
| Aches and pains                    | 12/29 | 41.4 | 58/237  | 24.5 | <b>0.046</b> |
| Poor perceived health              | 3/13  | 23.1 | 12/93   | 12.9 | 0.270        |
| <b>Impairments</b>                 |       |      |         |      |              |
| Hearing impairment                 | 10/30 | 33.3 | 88/238  | 37.0 | 0.431        |
| Vision impairment                  | 8/31  | 25.8 | 69/238  | 29.0 | 0.447        |

Note: <sup>a</sup> According to Paykel,<sup>15</sup> <sup>b</sup> In accordance with Fisher's exact test.

Field Code Changed

*Results of regression analyses*

Table 4 shows results of regression analyses. Never having children was associated with suicidal feelings. However, this association did not remain in the adjusted analysis. Depression was associated with a four-fold increase in odds of having suicidal feelings, and the association remained after adjusting for sex. As suicidal ideation is a symptom of depression, we reanalysed data after removing this symptom from the diagnostic algorithm. This did not affect our results. Both dissatisfaction with sleep and difficulties initiating sleep were associated with a more than three-fold increase in odds of having suicidal feelings. However, after adjusting for sex and depression, only difficulties initiating sleep remained an independent determinant.

Table 4. Results of separate exact logistic regression models showing odds of having past month suicidal feelings<sup>a</sup> (n=269).

|                                            | Crude           |           |              | Adjusted          |           |              |
|--------------------------------------------|-----------------|-----------|--------------|-------------------|-----------|--------------|
|                                            | OR <sup>b</sup> | 95 % CI   | p            | OR <sup>c</sup>   | 95 % CI   | p            |
| Sex                                        | 2.69            | 0.89-11.0 | 0.089        |                   |           |              |
| Always been single <sup>d</sup>            | 2.56            | 0.90-6.67 | 0.078        |                   |           |              |
| Children <sup>e</sup>                      | 0.41            | 0.16-0.96 | <b>0.037</b> | 0.47              | 0.18-1.11 | 0.091        |
| Any depression                             | 4.30            | 1.35-12.6 | <b>0.013</b> | 3.79 <sup>f</sup> | 1.18-11.2 | <b>0.025</b> |
| Dissatisfied with sleep <sup>g</sup>       | 3.39            | 1.12-13.8 | <b>0.026</b> | 3.02              | 0.99-12.4 | 0.053        |
| Difficulties initiating sleep <sup>h</sup> | 3.51            | 1.43-9.50 | <b>0.004</b> | 3.52              | 1.41-9.73 | <b>0.004</b> |
| Aches and pains <sup>i</sup>               | 2.17            | 0.89-5.16 | 0.091        |                   |           |              |

Note: <sup>a</sup> According to Paykel.<sup>15</sup> <sup>b</sup> Bivariate exact logistic regression. <sup>c</sup> Separate exact logistic regression, adjusted for sex and any depression. <sup>d</sup> Missing value for 3 subjects. <sup>e</sup> Missing value for 4 subjects. <sup>f</sup> Adjusted for sex. <sup>g</sup> Missing value for 6 subjects. <sup>h</sup> Missing value for 4 subjects. <sup>i</sup> Missing value for 3 subjects.

Field Code Changed

*Suicidal feelings and social factors*

Detailed data regarding social interactions were available for participants born in 1905-1909 (Table 5). Reports of too little time spent with friends and acquaintances and too little time spent with neighbours were associated with suicidal feelings (Table 6). The same was the case for reports of perceived loneliness. Too little time spent with friends and acquaintances and too little time spent with neighbours remained significant in separate regression models adjusted for sex and depression. The strongest association was found between spending too little time with friends and acquaintances, which yielded a more than six-fold increase in odds in the adjusted model.

Table 5. Social characteristics in participants with and without past month suicidal feelings<sup>a</sup> (n=166<sup>b</sup>).

|                                                                | Suicidal Feelings |      | No Suicidal Feelings |      | p            |
|----------------------------------------------------------------|-------------------|------|----------------------|------|--------------|
|                                                                | n=19              | %    | n=147                | %    |              |
| Has a confidant                                                | 13/18             | 72.2 | 105/141              | 74.5 | 0.517        |
| More than one confidant                                        | 6/17              | 35.3 | 59/135               | 43.7 | 0.348        |
| Too little time spent with children                            | 5/10              | 50.0 | 18/104               | 17.3 | <b>0.027</b> |
| Too little time spent with grandchildren                       | 2/9               | 22.2 | 21/101               | 20.8 | 0.600        |
| Too little time spent with friends and acquaintances           | 8/16              | 50.0 | 18/127               | 14.2 | <b>0.002</b> |
| Too little time spent with neighbours                          | 6/18              | 33.3 | 11/138               | 8.0  | <b>0.006</b> |
| Less time spent with friends and family than before retirement | 8/16              | 50.0 | 72/167               | 25.2 | <b>0.041</b> |
| Perceived loneliness                                           | 12/18             | 66.7 | 45/139               | 32.4 | <b>0.006</b> |

Note: <sup>a</sup> According to Paykel.<sup>15</sup> <sup>b</sup> Data available for participants born 1905-1909 only.

Field Code Changed

Table 6. Results of separate exact logistic regression models showing the association between social characteristics and past month suicidal feelings<sup>a</sup> (n=166<sup>b</sup>).

|  | Crude | Adjusted |
|--|-------|----------|
|--|-------|----------|

|                                                                             | OR <sup>c</sup> | 95 % CI   | p            | OR <sup>d</sup> | 95 % CI   | p            |
|-----------------------------------------------------------------------------|-----------------|-----------|--------------|-----------------|-----------|--------------|
| Too little time spent with children <sup>e</sup>                            | 4.69            | 0.97-22.8 | 0.054        |                 |           |              |
| Too little time spent with neighbours <sup>f</sup>                          | 5.67            | 1.46-20.7 | <b>0.011</b> | 5.00            | 1.10-20.9 | <b>0.036</b> |
| Too little time spent with friends and acquaintances <sup>g</sup>           | 5.94            | 1.71-20.9 | <b>0.004</b> | 6.61            | 1.59-29.9 | <b>0.007</b> |
| Less time spent with friends and family than before retirement <sup>h</sup> | 2.94            | 0.88-9.83 | 0.082        |                 |           |              |
| Perceived loneliness <sup>i</sup>                                           | 4.14            | 1.33-14.3 | <b>0.011</b> | 3.33            | 0.98-12.3 | 0.053        |

Note: <sup>a</sup> According to Paykel.<sup>15</sup> <sup>b</sup> Data available for participants born 1905-1909 only. <sup>c</sup> Bivariate exact logistic regression.

<sup>d</sup> Separate exact multivariate logistic regression, adjusted for sex and any depression. <sup>e</sup> Missing value for 52 subjects.

<sup>f</sup> Missing value for 10 subjects. <sup>g</sup> Missing value for 23 subjects. <sup>h</sup> Missing value for 23 subjects. <sup>i</sup> Missing value for 9 subjects.

Field Code Changed

## Discussion

To our knowledge, this is the first population-based study to examine thoughts of death and suicidal feelings in extreme old age. While depression was associated with suicidal feelings, three-quarters of those who had such feelings fulfilled criteria for neither major nor minor depression. Social factors were strong determinants of suicidal feelings.

Difficulties initiating sleep was associated with suicidal feelings even after depression was taken into consideration, which parallels findings from a population study that included “younger” older persons.<sup>21</sup> However, it is important to stress that conclusions regarding causality cannot be drawn from cross-sectional studies. The association may be bidirectional. The wish to die may keep the individual awake, and problematic sleep may lead to a wish to die.

Somewhat unexpectedly, we could not show relationships with several health-related factors.

Physical disability has been shown to associate with both suicidal feelings<sup>21</sup> and death by suicide<sup>22</sup> in younger populations. Most participants in the current study reported good to very good health. This is a unique population sample consisting of cognitively relatively intact persons who have reached extreme old age. One might argue that results might be inflated by

Field Code Changed

Field Code Changed

Field Code Changed

1  
2  
3  
4  
5  
6  
7 a tendency for persons in poor health to refuse participation to a greater extent than those in  
8 better health. However, our attrition analysis regarding mortality suggests that this is not the  
9 case. Another possibility is that individual perceptions of health and quality of life shift in the  
10 “oldest old”<sup>23</sup> which could render health factors of less importance in explaining suicidal  
11 feelings in extreme high age.  
12  
13  
14  
15

Field Code Changed

16  
17 A more than six-fold increase in odds of suicidal feelings was observed in the context of  
18 unsatisfactory frequency of social contacts. The literature on social factors and suicidal  
19 behaviour in older people is extremely limited.<sup>24</sup> Number and frequency of contacts have been  
20 reported in only a couple of studies.<sup>25 26</sup> The approach used in the current study allowed  
21 participants to give a subjective view of their social relations. This is important as also  
22 persons who are not socially isolated may feel detached from the community.<sup>27</sup>  
23  
24  
25  
26  
27  
28  
29  
30  
31

Field Code Changed

Field Code Changed

Field Code Changed

Field Code Changed

### 32 *Methodological considerations*

33  
34 Strengths of the study include the extreme high age of the participants and the fact that also  
35 persons living in institutions were included in this population-based study. Diagnostics were  
36 based on face-to-face interviews with clinicians trained in the use of a structured instrument  
37 for the rating of psychiatric symptoms. The CPRS has been shown to have good reliability  
38 and validity in elderly clinical samples.<sup>28</sup> Questions regarding death wishes and suicidal  
39 thoughts might be perceived as sensitive by some participants. Reporting suicidal feelings to  
40 an experienced psychiatrist, psychiatric nurse, or psychologist might be easier than to a lay  
41 interviewer. It should be pointed out that the Paykel questions encompass a broad range of  
42 phenomena and feelings of weariness of life and death wishes were far more common than  
43 serious suicidal ideation. Although this is the largest population-based study performed in  
44 extreme old age, the number of persons who seriously considered taking their lives during the  
45  
46  
47  
48  
49  
50  
51  
52  
53  
54  
55

Field Code Changed

1  
2  
3  
4  
5  
6  
7 past month was not large enough to allow for separate analyses. The problem of study power  
8 is further reflected by the large confidence intervals observed for some of the analyses.  
9  
10 Failure to show significance, for example regarding the regression model involving aches and  
11 pains may be due to study size. Finally, while the response rate (65 %) was fairly good  
12 considering the age group, it is possible that persons with suicidal feelings may have declined  
13 participation to a greater extent than those without such feelings. While this would result in an  
14 underestimation of past month suicidal feelings it is unclear how this might have impacted on  
15 the associations studied.  
16  
17  
18  
19  
20  
21  
22  
23

### 24 25 *Implications*

26  
27  
28 Screening programs that aim at the identification and treatment of depression may fail to  
29 identify persons who reached extreme old age who could benefit from interventions. The  
30 results of this study suggest that attention to pain and sleep issues as well as increased  
31 opportunities for social contacts might constitute targets for the reduction of suicidal feelings  
32 in very late life.  
33  
34  
35  
36  
37  
38  
39

### 40 41 **Acknowledgements**

42  
43  
44 The authors thank all study participants and co-workers at the Neuropsychiatric Epidemiology  
45 Unit. A special thank you to Thomas Marlow and Erik Joas for consultation regarding  
46 statistics.  
47  
48  
49

50  
51 **Contributors** MMF analyzed and interpreted the data and drafted the manuscript. SÖ, ABH  
52 and IS interpreted the data and critically revised the manuscript. IS was responsible for  
53  
54



1  
2  
3  
4  
5  
6  
7 planning the study and data collection. MW was responsible for supervision, drafted and  
8 critically revised the manuscript and interpreted the data. She is the guarantor of the study.

9  
10 **Funding** The study was made possible by grants from The Swedish Research Council 11267,  
11 2005-8460, 825-2007-7462, 2008-7245-5895-70, 2009-62X-21079-01-3, The Swedish  
12 Council for Working Life and Social Research (no 2001-2835, no 2001-2849, 2005-0762,  
13 2008-1210, Epilife 2006-1506), Stiftelsen Söderström-Königskas Sjukhemmet, Stiftelsen  
14 Gamla Tjänarinnor, Bror Gadelius Foundation, Hjalmar Svenssons Foundation, Swedish  
15 Brain Power, The Alzheimer's Association (IIRG-03-6168, ZEN-01-3151) and the Bank of  
16 Sweden Tercentenary Foundation.  
17

18  
19 **Competing interests** None declared.

20  
21 **Ethical approval** The Ethics Review Board at the University of Gothenburg approved the  
22 study. All participants were informed of their right to withdraw from the study at any time.  
23 Written consent was obtained. Among participants with clinical dementia, proxy informed  
24 consent was also obtained from a next of kin. All interviews were performed by highly  
25 experienced psychiatrists/psychiatric nurses/research psychologists. When a respondent  
26 reported serious suicidal ideation or other serious psychopathology the psychiatrist  
27 responsible for the medical study was informed and adequate care was initiated.  
28

29  
30 **Data sharing statement** There are no additional data available.  
31  
32  
33  
34  
35  
36  
37  
38  
39  
40  
41  
42  
43  
44

## 45 **References**

- 46  
47 1. World Health Organization. Public Health Action for the Prevention of Suicide, 2012.  
48 2. Jorm A, Henderson A, Scott R, Korten A, Christensen H, Mackinnon A. Factors associated  
49 with the wish to die in elderly people. *Age Ageing* 1995;24(5):389-92.  
50 3. Skoog I, Aevansson O, Beskow J, Larsson L, Palsson S, Waern M, et al. Suicidal feelings  
51 in a population sample of nondemented 85-year-olds. *Am J Psychiatry*  
52 1996;153(8):1015-20.  
53 4. Rao R, Denning T, Brayne C, Huppert F. Suicidal thinking in community residents over  
54 eighty. *Int J Geriatr Psychiatry* 1997;12(3):337-43.  
55

1  
2  
3  
4  
5  
6  
7  
8  
9  
10  
11  
12  
13  
14  
15  
16  
17  
18  
19  
20  
21  
22  
23  
24  
25  
26  
27  
28  
29  
30  
31  
32  
33  
34  
35  
36  
37  
38  
39  
40  
41  
42  
43  
44  
45  
46  
47  
48  
49  
50  
51  
52  
53  
54  
55  
56  
57  
58  
59  
60

5. Barnow S, Linden M, Freyberger H. The relation between suicidal feelings and mental disorders in the elderly: results from the Berlin Aging Study (BASE). *Psychol Med* 2004;34(4):741-46.
6. Scocco P, Meneghel G, Caon F, Dello Buono M, De Leo D. Death ideation and its correlates: survey of an over-65-year-old population. *J Nerv Ment Dis* 2001;189(4):210-8.
7. Scocco P, Fantoni G, Rapattoni M, de Girolamo G, Pavan L. Death ideas, suicidal thoughts, and plans among nursing home residents *J Geriatr Psychiatry Neurol* 2009;22(2):141-48.
8. O'Connell H, Chin A, Cunningham C, Lawlor B. Recent developments: suicide in older people. *BMJ* 2004;329(7471):895-9.
9. van Orden K, Conwell Y. Suicides in late life. *Curr Psychiatry Rep* 2011;13(3):234-41.
10. Borjesson-Hanson A, Waern M, Ostling S, Gustafson D, Skoog I. One-month prevalence of mental disorders in a population sample of 95-year olds. *Am J of Geriatr Psychiatry* 2011;19(3):284-91.
11. Andersson M, Guo X, Borjesson-Hanson A, Liebetrau M, Ostling S, Skoog I. A population-based study on dementia and stroke in 97 year olds. *Age Ageing* 2012;41(4):529-33.
12. Folstein M, Robins L, Helzer J. The Mini-Mental State Examination. *Arch Gen Psychiatry* 1983;40(7):812.
13. Skoog I, Nilsson L, Landahl S, Steen B. Mental disorders and the use of psychotropic drugs in an 85-year-old urban population. *Int Psychogeriatr* 1993;5:33-48.
14. Asberg M, Montgomery S, Perris C, Schalling D, Sedvall G. A comprehensive psychopathological rating scale. *Acta Psychiatr Scand Suppl* 1978(271):5-27.
15. Paykel E, Myers J, Lindenthal J, Tanner J. Suicidal feelings in the general population: a prevalence study. *Br J of Psychiatry* 1974;124(0):460-9.
16. Gottfries C, Brane G, Gullberg B, Steen G. A new rating scale for dementia syndromes. *Arch Gerontol Geriatr* 1982;1(4):311-30.
17. Brane G, Gottfries C, Winblad B. The Gottfries-Brane-Steen scale: validity, reliability and application in anti-dementia drug trials. *Dement Geriatr Cogn Disord* 2001;12(1):1-14.
18. Mellqvist M, Wiktorsson S, Joas E, Ostling S, Skoog I, Waern M. Sense of coherence in elderly suicide attempters: the impact of social and health-related factors. *Int Psychogeriatr* 2011:1-8.
19. American Psychiatric Association. *Diagnostic and Statistical Manual of Mental Disorders 3rd ed, revised*, 1987.
20. American Psychiatric Association. *Diagnostic and Statistical Manual of Mental Disorders 4th ed.*, 1994.
21. Lapierre S, Boyer R, Desjardins S, Dube M, Lorrain D, Preville M, et al. Daily hassles, physical illness, and sleep problems in older adults with wishes to die. *Int Psychogeriatr* 2012;24(2):243-52.
22. Kaplan M, McFarland B, Huguet N, Newsom J. Physical illness, functional limitations, and suicide risk: a population-based study. *Am J Orthopsychiatry* 2007;77(1):56-60.
23. Wilhelmson K, Andersson, C., Waern, M., Allebeck, P. Elderly people's perspectives on quality of life. *Ageing Soc* 2005;25:585-600.
24. Fassberg M, van Orden K, Duberstein P, Erlangsen A, Lapierre S, Bodner E, et al. A systematic review of social factors and suicidal behavior in older adulthood. *Int J Environ Res Public Health* 2012;9(3):722-45.

- 1  
2  
3  
4  
5  
6  
7 25. Bartels S, Coakley E, Oxman T, Constantino G, Oslin D, Chen H, et al. Suicidal and death  
8 ideation in older primary care patients with depression, anxiety, and at-risk alcohol  
9 use. *Am J Geriatr Psychiatry* 2002;10(4):417-27.  
10 26. Turvey C, Conwell Y, Jones M, Phillips C, Simonsick E, Pearson J, et al. Risk factors for  
11 late-life suicide: a prospective, community-based study. *Am J Geriatr Psychiatry*  
12 2002;10(4):398-406.  
13 27. Crocker L, Clare L, Evans K. Giving up or finding a solution? The experience of  
14 attempted suicide in later life. *Aging Ment Health* 2006;10(6):638-47.  
15 28. van der Laan N, Schimmel A, Heeren T. The applicability and the inter-rater reliability of  
16 the Comprehensive Psychopathological Rating Scale in an elderly clinical population.  
17 *Int J Geriatr Psychiatry* 2005;20(1):35-40.  
18  
19  
20  
21  
22  
23  
24  
25  
26  
27  
28  
29  
30  
31  
32  
33  
34  
35  
36  
37  
38  
39  
40  
41  
42  
43  
44  
45  
46  
47  
48  
49  
50  
51  
52  
53  
54  
55  
56  
57  
58  
59  
60

STROBE Statement—Checklist of items that should be included in reports of *cross-sectional studies*

|                              | Item No | Recommendation                                                                                                                                                                                 |
|------------------------------|---------|------------------------------------------------------------------------------------------------------------------------------------------------------------------------------------------------|
| <b>Title and abstract</b>    | 1       | (a) Indicate the study's design with a commonly used term in the title or the abstract<br>p. 1                                                                                                 |
|                              |         | (b) Provide in the abstract an informative and balanced summary of what was done and what was found<br>p. 2                                                                                    |
| <b>Introduction</b>          |         |                                                                                                                                                                                                |
| Background/rationale         | 2       | Explain the scientific background and rationale for the investigation being reported<br>p. 3                                                                                                   |
| Objectives                   | 3       | State specific objectives, including any prespecified hypotheses<br>p. 3                                                                                                                       |
| <b>Methods</b>               |         |                                                                                                                                                                                                |
| Study design                 | 4       | Present key elements of study design early in the paper<br>p. 4                                                                                                                                |
| Setting                      | 5       | Describe the setting, locations, and relevant dates, including periods of recruitment, exposure, follow-up, and data collection<br>p. 4                                                        |
| Participants                 | 6       | (a) Give the eligibility criteria, and the sources and methods of selection of participants<br>p. 4                                                                                            |
| Variables                    | 7       | Clearly define all outcomes, exposures, predictors, potential confounders, and effect modifiers. Give diagnostic criteria, if applicable<br>p. 4-8                                             |
| Data sources/<br>measurement | 8*      | For each variable of interest, give sources of data and details of methods of assessment (measurement). Describe comparability of assessment methods if there is more than one group<br>p. 4-8 |
| Bias                         | 9       | Describe any efforts to address potential sources of bias<br>p. 16                                                                                                                             |
| Study size                   | 10      | Explain how the study size was arrived at<br>p. 4                                                                                                                                              |
| Quantitative variables       | 11      | Explain how quantitative variables were handled in the analyses. If applicable, describe which groupings were chosen and why<br>p. 4-8                                                         |
| Statistical methods          | 12      | (a) Describe all statistical methods, including those used to control for confounding<br>p. 8                                                                                                  |
|                              |         | (b) Describe any methods used to examine subgroups and interactions<br>p. 8                                                                                                                    |
|                              |         | (c) Explain how missing data were addressed<br>p. 4 & 8                                                                                                                                        |
|                              |         | (d) If applicable, describe analytical methods taking account of sampling strategy                                                                                                             |
|                              |         | (e) Describe any sensitivity analyses<br>p. 13                                                                                                                                                 |
| <b>Results</b>               |         |                                                                                                                                                                                                |
| Participants                 | 13*     | (a) Report numbers of individuals at each stage of study—eg numbers potentially                                                                                                                |

|                          |     |                                                                                                                                                                                                                         |
|--------------------------|-----|-------------------------------------------------------------------------------------------------------------------------------------------------------------------------------------------------------------------------|
|                          |     | eligible, examined for eligibility, confirmed eligible, included in the study, completing follow-up, and analysed<br>p. 4                                                                                               |
|                          |     | (b) Give reasons for non-participation at each stage<br>p. 9-15                                                                                                                                                         |
|                          |     | (c) Consider use of a flow diagram                                                                                                                                                                                      |
| Descriptive data         | 14* | (a) Give characteristics of study participants (eg demographic, clinical, social) and information on exposures and potential confounders<br>p. 9                                                                        |
|                          |     | (b) Indicate number of participants with missing data for each variable of interest<br>p. 9                                                                                                                             |
| Outcome data             | 15* | Report numbers of outcome events or summary measures<br>p. 9-15                                                                                                                                                         |
| Main results             | 16  | (a) Give unadjusted estimates and, if applicable, confounder-adjusted estimates and their precision (eg, 95% confidence interval). Make clear which confounders were adjusted for and why they were included<br>p. 9-15 |
|                          |     | (b) Report category boundaries when continuous variables were categorized<br>p. 6-7                                                                                                                                     |
|                          |     | (c) If relevant, consider translating estimates of relative risk into absolute risk for a meaningful time period                                                                                                        |
| Other analyses           | 17  | Report other analyses done—eg analyses of subgroups and interactions, and sensitivity analyses<br>p. 8                                                                                                                  |
| <b>Discussion</b>        |     |                                                                                                                                                                                                                         |
| Key results              | 18  | Summarise key results with reference to study objectives<br>p. 15                                                                                                                                                       |
| Limitations              | 19  | Discuss limitations of the study, taking into account sources of potential bias or imprecision. Discuss both direction and magnitude of any potential bias<br>p. 16-17                                                  |
| Interpretation           | 20  | Give a cautious overall interpretation of results considering objectives, limitations, multiplicity of analyses, results from similar studies, and other relevant evidence<br>p. 15-17                                  |
| Generalisability         | 21  | Discuss the generalisability (external validity) of the study results<br>p. 16-17                                                                                                                                       |
| <b>Other information</b> |     |                                                                                                                                                                                                                         |
| Funding                  | 22  | Give the source of funding and the role of the funders for the present study and, if applicable, for the original study on which the present article is based<br>p. 19                                                  |

\*Give information separately for exposed and unexposed groups.

**Note:** An Explanation and Elaboration article discusses each checklist item and gives methodological background and published examples of transparent reporting. The STROBE checklist is best used in conjunction with this article (freely available on the Web sites of PLoS Medicine at <http://www.plosmedicine.org/>, Annals of Internal Medicine at <http://www.annals.org/>, and Epidemiology at <http://www.epidem.com/>). Information on the STROBE Initiative is available at [www.strobe-statement.org](http://www.strobe-statement.org).
